# Supplementary material
Source: PubMed Central journal article supplement (PMC5652606)
Supplement: DB170187SupplementaryData.pdf [file DB170187SupplementaryData.pdf]

**SUPPLEMENTARY MATERIAL**

**A loss-of-function splice acceptor variant in *IGF2* is protective for type 2 diabetes**

**Running Title: *IGF2* loss-of-function type 2 diabetes protective variant.**

*The SIGMA T2D Genetics Consortium*

Josep M Mercader<sup>1,2,3</sup>, Rachel G. Liao<sup>1\*</sup>, Avery Davis<sup>4,5,6\*</sup>, Zachary Dymek<sup>1\*</sup>, Karol Estrada<sup>1,7,8</sup>, Taru Tukiainen<sup>4,6,7</sup>, Alicia Huerta-Chagoya<sup>9</sup>, Hortensia Moreno-Macías<sup>9,10</sup>, Kathleen A. Jablonski<sup>11</sup>, Robert L. Hanson<sup>12</sup>, Geoffrey A. Walford<sup>1,2,8</sup>, Ignasi Moran<sup>13</sup>, Ling Chen<sup>1,2</sup>, Vineeta Agarwala<sup>6</sup>, María Luisa Ordoñez-Sánchez<sup>9</sup>, Rosario Rodríguez-Guillen<sup>9</sup>, Maribel Rodríguez-Torres<sup>9</sup>, Yayoi Segura-Kato<sup>9</sup>, Humberto García-Ortiz<sup>14</sup>, Federico Centeno-Cruz<sup>14</sup>, Francisco Barajas-Olmos<sup>14</sup>, Lizz Caulkins<sup>1</sup>, Sobha Puppala<sup>15</sup>, Pierre Fontanillas<sup>6</sup>, Amy Williams<sup>16</sup>, Sílvia Bonàs-Guarch<sup>3</sup>, Chris Hartl<sup>6</sup>, Stephan Ripke<sup>5,7,17</sup>, Diabetes Prevention Program Research Group<sup>6</sup>, Katherine Tooley<sup>4,5,6</sup>, Jacqueline Lane<sup>6,18,19</sup>, Carlos Zerrweck<sup>20</sup>, Angélica Martínez-Hernández<sup>14</sup>, Emilio J. Córdova<sup>14</sup>, Elvia Mendoza-Caamal<sup>14</sup>, Cecilia Contreras-Cubas<sup>14</sup>, María E. González-Villalpando<sup>21</sup>, Ivette Cruz-Bautista<sup>22</sup>, Liliana Muñoz-Hernández<sup>22</sup>, Donaji Gómez-Velasco<sup>22</sup>, Ulises Alvirde<sup>22</sup>, Brian E. Henderson<sup>23</sup>, Lynne R. Wilkens<sup>24</sup>, Loic Le Marchand<sup>24</sup>, Olimpia Arellano-Campos<sup>22</sup>, Laura Riba<sup>22</sup>, Maegan Harden<sup>25</sup>, Broad Genomics Platform<sup>25</sup>, Stacey Gabriel<sup>25</sup>, T2D-GENES Consortium<sup>6</sup>, Hanna E. Abboud<sup>26</sup>, Maria L. Cortes<sup>27</sup>, Cristina Revilla-Monsalve<sup>28</sup>, Sergio Islas-Andrade<sup>28</sup>, Xavier Soberon<sup>14</sup>, Joanne E. Curran<sup>29</sup>, Christopher P. Jenkinson<sup>30</sup>, Ralph A. DeFronzo<sup>31</sup>, Donna M. Lehman<sup>32</sup>, Craig L. Hanis<sup>33</sup>, Graeme I. Bell<sup>34,35</sup>, Michael Boehnke<sup>36</sup>, John Blangero<sup>29</sup>, Ravindranath Duggirala<sup>30</sup>, Richa Saxena<sup>6,18,19</sup>, Daniel MacArthur<sup>6,7,8</sup>, Jorge Ferrer<sup>13,37,38</sup>, Steven A. McCarroll<sup>4,5,6</sup>, David Torrents<sup>3,39</sup>, William C. Knowler<sup>12</sup>, Leslie J. Baier<sup>12</sup>, Noel Burt<sup>1</sup>, Clicerio González-Villalpando<sup>21</sup>, Christopher A. Haiman<sup>24</sup>, Carlos A. Aguilar-Salinas<sup>22</sup>, Teresa Tusié-Luna<sup>9</sup>, Jason Flannick<sup>1,2,40</sup>, Suzanne B.R. Jacobs<sup>1,2</sup>, Lorena Orozco<sup>14</sup>, David Altshuler<sup>2,4,6,8,18,40,41</sup>, Jose C. Florez<sup>1,2,8,#</sup>

<sup>6</sup>Members of the consortia are provided in Appendix S1.

\*These authors contributed equally to this work.

#To whom correspondence should be addressed.

1. Programs in Metabolism and Medical & Population Genetics, Broad Institute of Harvard and MIT, Cambridge, Massachusetts, USA.
2. Diabetes Unit and Center for Genomic Medicine, Massachusetts General Hospital, Boston, Massachusetts, USA.
3. Barcelona Supercomputing Center (BSC). Joint BSC-CRG-IRB Research Program in Computational Biology, 08034 Barcelona, Spain.
4. Department of Genetics, Harvard Medical School, Boston, Massachusetts, USA.

## SUPPLEMENTARY DATA

### *IGF2* loss-of-function T2D protective variant

5. Stanley Center for Psychiatric Research, Broad Institute of MIT and Harvard, Cambridge, Massachusetts, USA.
6. Program in Medical and Population Genetics, Broad Institute of Harvard and MIT, Cambridge, Massachusetts, USA.
7. Analytic and Translational Genetics Unit, Massachusetts General Hospital, Boston, Massachusetts 02114, USA.
8. Department of Medicine, Harvard Medical School, Boston, Massachusetts, USA.
9. Unidad de Biología Molecular y Medicina Genómica, I.d.I.B., UNAM/ Instituto Nacional de Ciencias Médicas y Nutrición Salvador Zubirán. Mexico City, México. Instituto de Investigaciones Biomédicas, UNAM Unidad de Biología Molecular y Medicina Genómica, UNAM/INCMNSZ, Coyoacán, 04510 Mexico City, Mexico.
10. Universidad Autónoma Metropolitana, Tlalpan 14387, Mexico City, Mexico.
11. The Biostatistics Center, George Washington University, Rockville, MD, 20852, USA.
12. Phoenix Epidemiology and Clinical Research Branch, National Institute of Diabetes and Digestive and Kidney Diseases, National Institutes of Health, Phoenix, Arizona, 85004, USA.
13. Department of Medicine, Imperial College London, London W12 0NN, United Kingdom.
14. Instituto Nacional de Medicina Genómica, Tlalpan, 14610, Mexico City, Mexico.
15. Department of Genetics, Texas Biomedical Research Institute, San Antonio, TX, USA.
16. Department of Biological Statistics and Computational Biology, Cornell University, Ithaca, New York, USA.
17. Department of Psychiatry and Psychotherapy, Charité–Universitätsmedizin Berlin, Campus Mitte, 10117 Berlin, Germany.
18. Center for Genomic Medicine, Massachusetts General Hospital, Boston, Massachusetts, USA.
19. Anesthesia, Critical Care and Pain Medicine, Massachusetts General Hospital and Harvard Medical School, Boston, MA, USA.
20. Clínica de Integral de Cirugía para la Obesidad y Enfermedades Metabólicas, Hospital General Tláhuac, Secretaría de Salud del CDMX. México City.
21. Centro de Estudios en Diabetes, Unidad de Investigación en Diabetes y Riesgo Cardiovascular, Centro de Investigación en Salud Poblacional, Instituto Nacional de Salud Pública, Mexico City, Mexico.
22. Departamento de Endocrinología y Metabolismo. Instituto Nacional de Ciencias Médicas y Nutrición Salvador Zubirán, Mexico City.
23. Department of Preventive Medicine, Keck School of Medicine, University of Southern California, Los Angeles, California, USA.
24. Epidemiology Program, University of Hawaii Cancer Center, Honolulu, Hawaii, USA.
25. The Genomics Platform, The Broad Institute of Harvard and MIT, Cambridge, Massachusetts, USA.
26. Department of Medicine, University of Texas Health Science Center at San Antonio, San Antonio, Texas, USA.
27. Broad Institute of Harvard and MIT, Cambridge, Massachusetts, USA.
28. Unidad de Investigación Médica en Enfermedades Metabólicas, CMN SXXI, Instituto Mexicano del Seguro Social, Mexico City, México.
29. South Texas Diabetes and Obesity Institute, School of Medicine, University of Texas Rio Grande Valley, Brownsville, TX, USA.
30. South Texas Diabetes and Obesity Institute, School of Medicine, University of Texas Rio Grande Valley, Edinburg, TX, USA.
31. Division of Diabetes, Department of Medicine, University of Texas Health Science Center at San Antonio, San Antonio, TX, USA.

## SUPPLEMENTARY DATA

### *IGF2* loss-of-function T2D protective variant

32. Departments of Medicine and Cellular & Structural Biology, University of Texas Health Science Center at San Antonio, San Antonio, TX, USA.
33. Human Genetics Center, University of Texas Health Science Center at Houston, Houston, Texas 77030, USA.
34. Department of Medicine, University of Chicago, Chicago, Illinois 60637, USA.
35. Department of Human Genetics, University of Chicago, Chicago, Illinois 60637, USA.
36. Department of Biostatistics, Center for Statistical Genetics, University of Michigan, Ann Arbor, Michigan 48109, USA.
37. Genomic Programming of Beta-cells Laboratory, Institut d'Investigacions August Pi i Sunyer (IDIBAPS), 08036 Barcelona, Spain.
38. CIBER de Diabetes y Enfermedades Metabólicas Asociadas (CIBERDEM), 08036 Barcelona, Spain.
39. Institució Catalana de Recerca i Estudis Avançats (ICREA), Barcelona, Spain.
40. Department of Molecular Biology, Harvard Medical School, Boston, Massachusetts, USA.
41. Department of Biology, Massachusetts Institute of Technology, Cambridge, Massachusetts, USA.

### **Corresponding author:**

#### **Jose C. Florez, M. D. Ph. D.**

*Chief, Diabetes Unit*

Massachusetts General Hospital

*Associate Professor of Medicine*

Harvard Medical School

*Institute Member*

Broad Institute

Diabetes Unit, Department of Medicine

Center for Genomic Medicine

Richard B. Simches Research Center

Massachusetts General Hospital

185 Cambridge Street, CPZN 5.250

Boston, MA 02114

Office: 617-643-3308

Fax: 617-726-5735

Email: [jcflorez@mgh.harvard.edu](mailto:jcflorez@mgh.harvard.edu)

## SUPPLEMENTARY DATA

*IGF2* loss-of-function T2D protective variant

### *Supplementary Figure legends*

**Supplementary Figure 1:** Genotype integration and imputation strategy. The sample was divided into two cohorts according to the technologies used to ascertain the genetic variants. A subset of the samples (Dataset 1) was genotyped on the OMNI2.5 (1) and exome chip arrays. Dataset 2 was also ascertained by whole-exome sequencing and was used as a Mexican specific reference panel (2). We imputed both the variants of the whole-exome-sequencing Mexican specific reference panel and the 1000G (phase 3, release June 2014) variants into the samples that did not have whole-exome sequencing information. We only imputed 1000G (phase 3) variants into the samples that had whole-exome sequencing, OMNI2.5 and exome chip genotypes. We then performed the association testing separately of each dataset and meta-analyzed both results.

**Supplementary Figure 2:** Characterization of the *IGF2-INS-TH* locus. Regional plot is shown for the *IGF2-INS-TH* and *KCNQ1*, without conditioning (a). Conditioning on rs139647931 and rs2237897 *KCNQ1* variants revealed two additional independent signals, rs4929965 and rs149483638 (b). 95% credible set when conditioning on the two *KCNQ1* variants and rs4929965 reveals the splice acceptor site variant (rs149483638) as top variant (c). 95% credible set when conditioning on rs149483638 and the *KCNQ1* variants (d). Point colors indicate the R-squared with the index SNP, marked in purple.

**Supplementary Figure 3:** Synthetic association plot. Whole-exome sequencing data from 3,732 individuals was integrated with OMNI2.5 and exome array genotypes as described in Supplementary Figure 1. All the variants with minor allele frequency (MAF) < 0.001 were removed from the analysis. Low-frequency variants (0.001 < MAF < 0.05) were sequentially added into the model starting from the most significant variant. The first line represents the odds ratio (OR) and the 95% confidence interval for the association of the rs149484648 variant. Each of the following lines represent the estimated OR and 95% confidence interval of the rs149483638 after adding, in a sequential manner each of the low-frequency variants into the model. As shown in the plot, the rs149483638 association was did not disappear when adding up to 50 low-frequency variants into the model, which suggest that this signal is not driven by the presence of low-frequency variants strongly associated with the disease.

## SUPPLEMENTARY DATA

*IGF2* loss-of-function T2D protective variant

**Supplementary Figure 4:** Forest plot for the meta-analysis of rs10770141 variant, near *TH*. Odds ratios for the meta-analyses are represented with a diamond.

**Supplementary Figure 5.** Gene expression of isoform 2, as measured by expression of exon 2 of *IGF2* across tissues and cell lines. Expression across T2D- relevant tissues extracted from GTEx (left panel). Gene expression was also analyzed in different embryonic cell lines, including embryonic cell-line derived pancreatic precursors (right panel). \*human embryonic stem cells presented here were included among the cell lines approved by NIH in 2010 to preempt the use of federal funds to generate new cell lines from human embryos.

**Supplementary Figure 6.** Expression level of *IGF2* in human pancreatic progenitors and other tissues. RNA-seq data showing the expression of *IGF2* isoforms in various adult human tissues (lung, muscle, adrenal, heart, adipose, breast, colon, brain, prostate and kidney), hESC-derived cell lines (mesenchymal, mesendoderm, trophoblast and neuronal progenitors) and hESC-derived pancreatic progenitors. The yellow box highlights the location of the *IGF2* exon of interest, which is highly expressed in human pancreatic progenitors, as opposed to most other tissues and cell lines. All tracks are scaled to a maximum of 20 RPKM.

**Supplementary Figure 7.** The dosage of the T2D protective A allele was not correlated with expression of total *IGF2* expression (as measured by expression levels of the exon 3) in liver (a) and in adipose tissue (b) nor was total circulating IGF2 (c). The expression of all IGF2 (as measured by exon 3 expression) was not correlated with T2D status (d) or HbA1c in non-diabetic individuals (e).

**Supplementary Figure 8.** Association of human homozygous “knockouts” for isoform 2 of *IGF2* (AA homozygous) with other diseases or clinical outcomes. While “homozygous knock-outs” were associated with ~40% reduced risk for T2D, there was no evidence of increased risk for other diseases in individuals homozygous for the A allele.

## SUPPLEMENTARY DATA

*IGF2* loss-of-function T2D protective variant

### ***Supplementary Note (online)***

#### **Detailed description of study participants**

##### *Diabetes in Mexico Study (DMS):*

Individuals were enrolled in the study, recruited from two tertiary level institutions (IMSS and ISSSTE) located in Mexico City. The diagnosis of T2D was made based on ADA criteria. 811 unrelated healthy subjects older than 45 years and with fasting glucose levels below 100 mg/dL were classified as controls. 569 unrelated individuals, older than 18 years, with either previous T2D diagnosis or fasting glucose levels above 125 mg/dL were included as T2D cases. Individuals with fasting glycemia between 100-125 mg/dL were excluded. Informed consent was obtained from all participants. The study was conducted with the approval of the Ethics and Research Committees of all institutions involved. Genomic DNA was purified from whole blood samples using a modified salting-out precipitation method (Gentra Puregene, Qiagen Systems, Inc., Valencia, CA, USA).

Clinical history of these individuals was manually reviewed and incidence of difference diseases was used for the phenome-wide association analysis.

##### *Mexico City Diabetes Study (MCDS):*

The Mexico City Diabetes Study is a population based prospective investigation. All 35-64 years of age men and non-pregnant women residing in the study site (low income neighborhoods equivalent to 6 census tracks with a total population of 15,000 inhabitants) were interviewed and invited to participate in the study. We had a response rate of 67% for the initial exam. Diagnostic criteria for type 2 diabetes were recommended by the ADA. Fasting glucose 126 mg/dL or more or 2 hr post 75 gr of glucose load 200 or more. If a participant was diagnosed as diabetic by a physician and was under pharmacologic therapy for diabetes he was considered as diabetic regardless the blood glucose levels. The study was conducted with the approval of the Ethics and Research Committees

## SUPPLEMENTARY DATA

### *IGF2* loss-of-function T2D protective variant

of all institutions. Informed consent was obtained from all participants. Genomic DNA was extracted from whole blood using the QIAmp 96 DNA Blood Kit (12) (Qiagen, Cat. No. 51162).

### *Multiethnic Cohort (MEC):*

The MEC consists of 215,251 men and women in Hawaii and Los Angeles, and comprises mainly five self-reported racial/ethnic populations: African Americans, Japanese Americans, Latinos, Native Hawaiians and European Americans (3). Between 1993 and 1996, adults between 45 and 75 years old were enrolled by completing a 26-page, self-administered questionnaire asking detailed information about dietary habits, demographic factors, level of education, personal behaviors, and history of prior medical conditions (e.g., diabetes). Potential cohort members were identified through Department of Motor Vehicles drivers' license files, voter registration files and Health Care Financing Administration data files. In 2001, a short follow-up questionnaire was sent to update information on dietary habits, as well as to obtain information about new diagnoses of medical conditions since recruitment. Between 2003 and 2007, we re-administered a modified version of the baseline questionnaire. All questionnaires inquired about history of diabetes, without specification as to type (1 vs. 2). Between 1995 and 2004, blood specimens were collected from ~67,000 MEC participants at which time a short questionnaire was administered to update certain exposures, and collect current information about medication use.

Cohort members in California are linked each year to the California Office of Statewide Health Planning and Development (OSHPD) hospitalization discharge database, which consists of mandatory records of all in-patient hospitalizations at most acute-care facilities in California. Records include information on the principal diagnosis plus up to 24 other diagnoses (coded according to ICD-9), including T1D and T2D. In Hawaii cohort members have been linked with the diabetes care registries for subjects with Hawaii Medical Service Association (HMSA) and Kaiser Permanente Hawaii (KPH) health plans (~90% of the Hawaii population has one of these two plans). Information from these additional databases has been utilized to assess the percentage of

## SUPPLEMENTARY DATA

### *IGF2* loss-of-function T2D protective variant

T2D controls (as defined below) with undiagnosed T2D, as well as the percentage of identified diabetes cases with T1D rather than T2D. Based on the OSHPD database <3% of T2D cases had a previous diagnosis of T1D. We did not use these sources to identify T2D cases because they did not include information on diabetes medications, one of our inclusion criteria for cases (see below).

In the MEC, diabetic cases were defined using the following criteria: (a) a self-report of diabetes on the baseline questionnaire, 2nd questionnaire or 3rd questionnaire; and (b) self-report of taking medication for T2D at the time of blood draw; and (c) no diagnosis of T1D in the absence of a T2D diagnosis from the OSHPD (California Residents). Controls were defined as: (a) no self-report of diabetes on any of the questionnaires while having completed a minimum of 2 of the 3 (~80% of controls returned all 3 questionnaires); and (b) no use of medications for T2D at the time of blood draw; and (c) no diabetes diagnosis (type 1 or 2) from the OSHPD, HMSA or KPH registries. To preserve DNA for genetic studies of cancer in the MEC, subjects with an incident cancer diagnosis at time of selection for this study were excluded. Controls were frequency matched to cases on sex, ethnicity and age at entry into the cohort (5-year age groups) and for Latinos, place of birth (U.S. vs. Mexico, South or Central America), oversampling African American, Native Hawaiian and European American controls to increase statistical power. Many of the T2D variants have also been evaluated in studies of cancer in the MEC which allowed for inclusion of additional controls who met the criteria above.

Altogether, this study included 2,231 T2D cases and 2,607 controls of Latin American ethnicity. Informed consent was obtained from all participants. The study was conducted with the approval of the Ethics and Research Committees of all institutions. Genomic DNA extraction was done using Qiagen from buffy coat.

*UNAM/INCMNSZ Diabetes Study (UIDS):*



## SUPPLEMENTARY DATA

### *IGF2* loss-of-function T2D protective variant

Cases were recruited at the outpatient diabetes clinic of the Department of Endocrinology and Metabolism of the Instituto Nacional de Ciencias Médicas y Nutrición Salvador Zubirán (INCMNSZ). All Mexican-mestizo individuals were invited to participate in the study. Diagnosis of type 2 diabetes was done following the American Diabetes Association criteria, i.e., fasting plasma glucose values  $\geq 126$  mg/dL, current treatment with a hypoglycemic agent, or casual glucose values  $\geq 200$  mg/dL.

Control subjects were recruited from a cohort of adults aged 45 years or older among government employees, blue collar workers and subjects seeking for attention in medical units for any condition besides those considered as exclusion criteria (see below). Normoglycemic status was defined as having a fasting plasma glucose concentration  $< 100$  mg/dL and no previous history of hyperglycemia, gestational diabetes or use of metformin.

Patients were interviewed following a standardized questionnaire; it included the medical history, a previously validated, three days food record and a physical activity registry. In addition a blood sample (after 9-12 hours of fasting) was obtained. The questionnaire included demographic, socio-economic and medical history of the patients and their family. Blood pressure, height, waist circumference and weight must be measured in the same visit. For taking blood pressure, systolic and diastolic pressure were recorded using a mercury sphygmomanometer; subjects remained seated and at rest for five minutes before measuring.

Inclusion criteria: Men or women aged 25 years or older, with BMI greater than 20 but lower than 40 kg/m<sup>2</sup>.

Exclusion criteria: Diabetes, coronary heart disease, stroke, transient ischemic attack, lower limb amputations, alcoholism (more than 10 servings of alcohol per week) or any disease that in opinion of the researcher may limit life expectancy to less than 2 years. Subjects that planned to move out of town permanently during the next three years were also excluded. Pregnant women,

## SUPPLEMENTARY DATA

### *IGF2* loss-of-function T2D protective variant

individuals with drug addictions, the use of systemic corticosteroids in pharmacologic doses (intravenous, oral or injectable, including injections in the joints) were exclusion criteria also. Replacement dosage of systemic corticosteroids (up 7.5 mg/day of prednisone or 30 mg/day of hydrocortisone or its equivalent; as well as inhaled or topical corticosteroids) was allowed into the study. Other exclusion criteria were: active liver disease (defined as AST (SGOT) or ALT (SGPT) > 2.0x upper limit of the normal range, alkaline phosphatase (ALK-P) > 1.5x upper limit of the normal range or total bilirubin > 1.5x upper limit of the normal range), significant renal dysfunction (defined as serum creatinine > 1.7 upper limit of the normal range or nephrotic syndrome), any history of malignancy (except for basal cell skin carcinoma) and uncontrolled depression or psychosis.

Informed consent was obtained from all participants. The study was conducted with the approval of the Ethics and Research Committees of all institutions. Genomic DNA was extracted from whole blood using the QIAmp 96 DNA Blood Kit (12) (Qiagen, Cat. No. 51162).

### *Pima Native Americans*

Diabetes was diagnosed by 1997 American Diabetes Association criteria; details for this cohort have been described previously (4). rs149483638 was analyzed in 3,199 full heritage Pima Indians selected from a longitudinal study (4). These individuals included 1,847 women and 1,352 men; mean age at examination was 40.6 ( $\pm$ 16.5) years, and 1519 individuals (47%) had diabetes. The frequency of the A allele of rs149483638 was 0.149 (0.169 in non-T2D and 0.135 in T2D). Mean (SD) age was 40.8 (16.4) (49.5 [13.0] for affected, 33.0 [14.4] for unaffected). Mean (SD) age at onset for affected was 35.9 (12.5). Mean (SD) maximum BMI observed in the longitudinal study was 37.6 (8.7) (38.9 [8.7] for affected; 36.3 [8.5] for unaffected). Mean (SD) fasting glucose: 134.1 (69.0) mg/dL (181.1 [78.5] for affected; 94.1 [9.6] for unaffected).

## SUPPLEMENTARY DATA

### *IGF2* loss-of-function T2D protective variant

Genotypes were assessed by the BeadXpress system (Illumina, San Diego, CA) according to the manufacturer's instructions. The association between genotype and diabetes was assessed under an additive model by logistic regression model with control for age, sex, birth year, and proportion of Amerindian ancestry (estimated using 45 ancestry informative markers). The model was fit by the generalized estimating equation method to account for familial dependence among siblings.

### *The Type 2 Diabetes Genetic Exploration by Next-generation sequencing in multi-Ethnic Samples T2D-GENES Consortium (T2D-GENES):*

All the exons were sequenced in 12,294 additional individuals as part of the whole-exome sequencing studies performed through the Genetics of Type 2 Diabetes (GoT2D) and Type 2 Diabetes Genetic Exploration by Next-generation sequencing in multi-Ethnic Samples (T2D-GENES) consortia. Individuals were selected spanning 5 ethnicities: European (the FUSION study (5)[FUSION], the METSIM study (6)[METSIM], KORA-gen (7)[KORA], the WTCCC/UKT2D consortium (8; 9) and the UK Adult Twin Registry (10)[UKT2D], as well as Ashkenazi individuals recruited from the metropolitan New York region (11)[Ashkenazim] and small number of individuals from the Finnish [Botnia] and Swedish [Malmo] prospective cohorts used for the initial sequencing experiment (12-19)), African-American (the Jackson Heart Study (JHS) cohort [JHS] as well as additional individuals recruited from North Carolina, South Carolina, Georgia, Tennessee, or Virginia (20)[WFS]), South Asian (the London Life Sciences Prospective Population Study (LOLIPOP) (21; 22)[LOLIPOP] and Singapore Indian Eye Study (SINDI) (23)[Singapore Indians]), East Asian (the Korean Association Resource (KARE) (24)[KARE] as well as the Singapore Diabetes Cohort Study (SDCS) and Singapore Prospective Study Program (25-27)[Singapore Chinese]), and Hispanic (the San Antonio Family Heart Study (FHS) (28), the San Antonio Family Diabetes/Gallbladder Study (SAFDGS) (29), the Veterans Administration Genetic Epidemiology Study (VAGES) (30), the Family Investigation of Nephropathy and Diabetes (FIND) (31), San Antonio component [San Antonio], and individuals from Starr County, TX (32)[Starr

## SUPPLEMENTARY DATA

### *IGF2* loss-of-function T2D protective variant

County]). Data generation and processing was performed in an identical fashion as for the initial sequencing experiment, although target capture was performed with the Agilent SureSelect Human All Exon platform rather than a custom hybrid capture array.

### *Diabetes in Mexico Study 2 (DMS2):*

This cohort included 1228 unrelated volunteers from different ethnic groups along Mexico (Tarahumara, Yaqui, Mayo, Mixteco, Náhuatl, Otomí, Chinanteco, Mixe, Zapoteco, Mazateco, Totonaco, Huasteco, Maya, Kanjobal, Mame, Poptijacalteco, Kaqchikel, Tojolabal, Chontal, Huave). Inclusion criteria were that they identified themselves as indigenous, both parents and their four grandparents speak the same native language and were born in the same community. The diagnosis of T2D was made based on ADA criteria. Seven hundred eighty-three unrelated healthy subjects older than 45 years and with fasting glucose levels below 100 mg/dL were classified as controls. Four hundred forty-five unrelated individuals, older than 18 years, with either previous T2D diagnosis or fasting glucose levels above 125 mg/dL were included as T2D cases. Individuals with fasting glucose levels between 100-125 mg/dL were excluded. Informed consent was obtained from all participants. The study was conducted with the approval of the Ethics and Research Committees of all institutions involved. Genomic DNA was purified from whole blood samples using a modified salting-out precipitation method (Gentra Puregene, Qiagen Systems, Inc., Valencia, CA, USA). Genotyping of the rs149483638 variant was performed using a custom TaqMan SNP Genotyping Assay (Applied Biosystems, Foster City, CA, USA) and genotype of each sample was assigned automatically by SDS 2.3 software (Applied Biosystems, Foster City, CA, USA). For the genotyping quality control, 5% of samples were randomly selected and measured in duplicates. TaqMan probes: Allele 'C' VIC-CAAACCTCTCCA[G]GAGATG. Allele 'T' FAM-CAAACCTCTCCA[A]GAGATG. 5 Positive controls were added to all plates and verified that their genotype matched the expected.

Association analyses were performed by logistic regression adjusting for age, BMI, gender and the

## SUPPLEMENTARY DATA

### *IGF2* loss-of-function T2D protective variant

first two principal components derived from a panel of 96 ancestry informative markers (33).

Clinical history of these individuals was manually reviewed and incidence of difference diseases was used for the phenome-wide association analysis.

### *San Antonio Mexican American Family Studies (SAMAFS):*

Genotypes for rs11564732, which showed an  $r^2=0.89$  with rs149483638 in our discovery sample, was carried out using the MassARRAY system (Sequenom, San Diego, CA). Variant assay primers were designed using Sequenom's online assay design tool in conjunction with their MassARRAY Assay Designer v4.0 software, to amplify ~100bp surrounding the variant for amplification in the MassEXTEND reaction. The MassARRAY Matrix Liquid Handler was used for automated preparation of reaction products which were then spotted onto 384-sample SpectroCHIP arrays using the MassARRAY Nanodispenser chip spotting station. Spotted arrays were loaded into the MassARRAY Analyzer 4 and sample genotypes determined by measuring the migration times, within a vacuum for each base at a specific locus (MALDI-TOF MS). Analysis of spectra and generation of genotypes was conducted using Sequenom's TyperAnalyzer software v4.0.21. Samples were from three Mexican American family studies from San Antonio, Texas: San Antonio Family Heart Study (28)(SAFHS); San Antonio Family Diabetes/Gallbladder Study (29)(SAFDGS); and the Veterans Administration Genetic Epidemiology Study (30). These studies are referred to as the San Antonio Mexican American Family Studies (SAMAFS). The rs11564732 genotypic data were available for 2,980 SAMAFS individuals (Mean age [ $\pm$  SD]=49.9  $\pm$  15.6; Mean BMI [ $\pm$  SD]=32.3  $\pm$  8.2; Females=61%; T2D=40%).

The association analysis was carried out using FBAT, assuming the additive model and using the residuals resulting from regressing out age, age<sup>2</sup> and BMI (34).

### *Diabetes Prevention Program*

## SUPPLEMENTARY DATA

### *IGF2* loss-of-function T2D protective variant

The DPP enrolled 3,234 US participants at high risk of developing diabetes (on the basis of overweight, increased fasting glucose and impaired glucose tolerance) and randomised them to placebo, metformin 850 mg twice daily or a lifestyle intervention aimed at  $\geq 7\%$  weight loss and  $\geq 150$  min of physical activity per week; a fourth arm of 585 participants initially randomised to troglitazone was terminated early because of concerns with hepatotoxicity (35). The main endpoint was development of diabetes confirmed by OGTT. The trial was conducted at 27 centers, all of which obtained individual Institutional Review Board approval. The DPP showed that participants treated with metformin or with a lifestyle intervention were 31% or 58% less likely to develop diabetes after an average of 3 years of follow-up, respectively (35). The 3,548 DPP participants presented here (2,994 who completed the trial in the placebo, metformin or lifestyle arms, plus 554 originally randomised to troglitazone) provided informed consent specific to genetic investigation. The distribution of self-reported ethnicities among participants in this genetic study was 56.4% white, 20.2% African American, 16.8% Hispanic, 4.3% Asian and 2.4% American Indian. The mean age was 51 years and mean BMI was 34.0 kg/m<sup>2</sup>.

rs149483638 was genotyped as part of the Human Core Exome genotyping array from Illumina at the Genomics Platform at the Broad Institute. Genotyping and calling was performed as described below. Genotyping of rs149483638 was completed with high quality on the Human Core Exome genotyping arrays (99.9% call rate). The association between the outcome variables and the marker was tested using multivariable mixed model regression. All models were adjusted for age at randomization, sex, study site, and population stratification using principal components derived only from Hispanic and Amer-Indian subjects. Clinic was entered into the model as a random effect. In additional models, waist was added in addition to these covariates. Because of the low frequency of the minor allele in the other ethnic groups, only self-reported Hispanics (n=538) and American Indians (n=78) are included in the analysis. These two groups were analyzed together and then tested in stratified models as only the Hispanic group has individuals homozygous for the rare

## SUPPLEMENTARY DATA

### *IGF2* loss-of-function T2D protective variant

allele. Given the possibility that variants in *IGF2* exhibit a parent-of-origin effect, besides the additive model (per allele effect) we also tested the homozygous extremes model (comparing CC vs TT) in order to reduce the noise of heterozygous subjects in cases parent-of-origin is present.

The natural log of ISI and the IGR was used in the analysis because their distributions are skewed. Because these hypotheses represent confirmation of previous findings (and thus possess a high prior probability), a P value of 0.05 was considered statistically significant. Insulin sensitivity index (ISI), the reciprocal of insulin resistance by homeostasis model assessment, was calculated as  $22.5/[\text{fasting insulin} \times (\text{fasting glucose}/18.01)]$ . The mean ISI values were compared at baseline.

The Insulin Index was defined as  $[(\text{insulin at 30 min}) - (\text{insulin at 0 min})]/[(\text{glucose at 30 min}) - (\text{glucose at 0 min})]$ . The mean Ins Index values were compared at baseline.

### *Resource for Genetic Epidemiology Research on Adult Health and Aging (GERA)*

GERA cohort data was obtained through dbGaP under accession phs000674.v1.p1 (36). The Resource for Genetic Epidemiology Research on Aging (GERA) Cohort was created by a RC2 "Grand Opportunity" grant that was awarded to the Kaiser Permanente Research Program on Genes, Environment, and Health (RPGEH) and the UCSF Institute for Human Genetics (AG036607; Schaefer/Risch, PIs). The RC2 project enabled genome-wide SNP genotyping (GWAS) to be conducted on a cohort of over 100,000 adults who are members of the Kaiser Permanente Medical Care Plan, Northern California Region (KPNC), and participating in its RPGEH. The resulting GERA cohort is 42% male, 58% female, and ranges in age from 18 to over 100 years old with an average age of 63 years at the time of the RPGEH survey (2007). The sample is ethnically diverse, generally well-educated with above average income. Approximately 69% of the participants are married or living with a partner. Length of membership in KPNC averages 23.5 years. UCSF and RPGEH investigators worked with the genomics company Affymetrix to design four custom microarrays for genotyping each of the four major race-ethnicity groups included in the GERA

## SUPPLEMENTARY DATA

### *IGF2* loss-of-function T2D protective variant

Cohort, described in detail in Hoffmann et al., 2011a and 2011b. Following genotyping and quality control procedures, and after removal of invalid, discordant, or withdrawn samples, about 103,000 participants were successfully genotyped. The resulting genotypic data were linked to survey data and data abstracted from the electronic medical records. As described below, all RPGEH participants were mailed new consent forms with explicit discussion of the placement of data in the NIH-maintained dbGaP. About 77% of participants returned completed consent forms, resulting in a final sample size of 78,486 participants in the GERA Cohort with data for deposit into dbGaP.

A subset of Hispanic individuals (1064 cases and 4832 controls) from the GERA cohort, as potential carriers of the rs149483638 variant were separately QCed and analyzed. All genotyped datasets separately underwent the same 3-step quality control protocol using PLINK and included 2 stages of SNP removal and an intermediate stage of sample exclusion.

The exclusion criteria for genetic markers consisted on: proportion of missingness  $\geq 0.05$ , Hardy-Weinberg Equilibrium p-value  $\leq 1 \times 10^{-20}$  for all the cohort. Only for the GERA cohort we considered a MAF of 0.001 as exclusion criteria because of the large sample size of this dataset. This protocol for genetic markers was performed twice, before and after sample exclusion.

For the individuals, we considered the following exclusion criteria: gender discordance, subject relatedness (pairs with  $\geq 0.125$  from which we removed the individual with the highest proportion of missingness), variant call rates  $\geq 0.02$  and population structure showing more than 4 standard deviations within the distribution of the study population according to the first seven principal components.

The presence of up to 18 medical conditions besides T2D was taken into account for the phenome-wide association analysis. The description of ICD9 codes that are included in each of the medical conditions can be found here (<https://www.ncbi.nlm.nih.gov/projects/gap/cgi-bin/GetPdf.cgi?id=phd004308> ).



## SUPPLEMENTARY DATA

### *IGF2* loss-of-function T2D protective variant

We performed a two-stage imputation procedure, which consisted in pre-phasing the genotypes into whole chromosome haplotypes followed by imputation itself. The pre-phasing was performed using the SHAPEIT2 (37) tool, IMPUTE2 for genotype imputation and the SNPTEST ([https://mathgen.stats.ox.ac.uk/genetics\\_software/snptest/snptest.html#introduction](https://mathgen.stats.ox.ac.uk/genetics_software/snptest/snptest.html#introduction)) tool for association testing. GWIMp-COMPSs can incorporate the contribution of several reference panels, and in this work we used 1000 Genomes (1000G) Phase3 haplotypes (October, 2014) (38). Association testing was performed by additive logistic regression using SNPTEST, and adjusting for the 7 derived principal components, age, and body mass index.

### **Exome chip SNP genotyping and quality control**

The Genomics Platform at the Broad Institute (Cambridge, MA) received, QC'd and tracked DNA samples for Exome array processing. The exome array was designed in order to cover rare and low-frequency coding variants identified through whole-exome sequencing studies of 12,031 individuals from different populations including 362 individuals of Hispanic ancestry.

The samples were plated into 96-well plates that included a quality control sample for processing on the Illumina HumanExome BeadChip (Illumina, Inc. San Diego, CA) using manufacturer's protocols. The arrays were scanned using Illumina iScans. Genotypes were called using three different calling algorithms: Illumina GenCall, Z-call (39) and Birdsuite (<http://www.broadinstitute.org/science/programs/medical-and-population-genetics/birdsuite/birdsuite-0>).

Clusters were fit using the Birdseed algorithm to each genotyping plate independently. Genotypes with confidence below 99.9% were excluded from analysis (e.g. considered "missing" or "no-call" genotypes). Samples with low numbers of non-reference alleles (< ~20,000, depending on the cohort), low call rate (<99.3%) or unusually high heterozygosity (> ~0.05, depending on the cohort) were removed from subsequent analysis; thresholds were chosen based on visual inspection of the

## SUPPLEMENTARY DATA

### *IGF2* loss-of-function T2D protective variant

sample distributions. Variants with low call rate (<99.2%) or mean confidence for alternative genotype calls (<99%) were also excluded from subsequent analysis.

### **RNA isolation from frozen tissue samples**

RNA was extracted via the miRNeasy Mini Kit from Qiagen. This kit combines a phenol/guanidine-based lysis and a silica-membrane based purification. Tissue specimens were prepared and cut to 20-25 mg on a dry ice bath, then placed in 2 mL processing tubes containing QIAzol lysis reagent and a steel bead. Tubes were then placed in the TissueLyser for 5 min at 25Hz to lyse and homogenize the samples.

After homogenizing, tubes were incubated at room temperature for 5 min. 140  $\mu$ L chloroform was then added to each tube containing homogenate. Samples incubated at room temperature for 2-3 min and were centrifuged at 12,000xg/4C for 15 min.

After centrifugation, the samples separated into 3 phases: an upper, colorless aqueous phase containing RNA, a white interphase, and a lower, red organic phase. The upper aqueous phase was carefully transferred to a new 1.5mL eppendorf tube (~350  $\mu$ L). 525  $\mu$ L of 100% ethanol was added to this phase and mixed thoroughly by pipetting up and down several times.

The entire sample, including any precipitate, was pipetted into RNeasy mini spin columns and then centrifuged for 15 s at 8000xg in order to collect and discard the flow-through.

350  $\mu$ L Buffer RWT was pipetted into the RNeasy Mini spin column and centrifuged for 15s at 8000xg to wash. The flow-through was again discarded.

80  $\mu$ L of DNase I diluted with buffer RDD was pipetted directly onto each column membrane and incubated at room temp for 15 minutes.

350  $\mu$ L Buffer RWT was then pipetted onto the DNase I remaining on the RNeasy Mini spin column and centrifuged for 15s at 8000xg, flow through discarded

## SUPPLEMENTARY DATA

### *IGF2* loss-of-function T2D protective variant

700  $\mu$ L Buffer RWT was then added to the RNeasy Mini spin column, centrifuged for 15s at 8000xg, and the flow through discarded.

500 $\mu$ L Buffer RPE was then pipetted onto the RNeasy Mini spin column and centrifuged for 15s at 8000xg. The flow through was again discarded. Again 500  $\mu$ L Buffer RPE was pipetted onto the RNeasy Mini spin column and centrifuged for 2 min at 8000xg.

The RNeasy Mini spin columns were then placed into new 2mL collection tubes and centrifuged at full speed for 1 min. This allowed the membrane to fully dry out, ensuring no ethanol was carried over during RNA elution.

For each sample, the RNeasy Mini spin column was transferred to a new 1.5 ml eppendorf tube. 20  $\mu$ L RNase-free water was then added directly to the spin column membrane. The tubes were then centrifuged for 1 min at 8000xg to elute the RNA. This step was then repeated a second time.

The RNA samples were then capped and incubated at 65°C  $\times$  5 minutes to denature the RNA and then chilled immediately on wet ice for 2-3 minutes.

### ***Supplementary text (online)***

#### **Fine mapping and credible set analysis of *IGF2-INS-TH* locus**

In order to better characterize both the primary and the secondary signal, we performed a credible set analysis of the two regions, after integrating the exome chip results with Omni 2.5 Illumina array genotypes that were available for the majority of the samples (1), and exome-sequencing data that was available for 41% of the samples (2) genotyped by exome-chip. We imputed both exome-seq and 1000G (phase 3, release June 2014) variants into the samples that did not have whole-exome sequencing information, and only 1000G (phase 3) variants into the samples that had whole-exome sequencing, OMNI2.5 and exome chip genotypes. We then performed the association testing separately of each dataset and meta-analyzed both results (Supplementary Figure 1). We used this

## SUPPLEMENTARY DATA

### *IGF2* loss-of-function T2D protective variant

data as input to perform the credible set analysis, following the previously described methodology (40). The splice site variant (rs149483638) ranked first according to its posterior probability, being the one with the highest prior of being the causal variant (Supplementary Figure 2).

When conditioning for these two *KCNQ1* variants and the rs149483638 in order to identify secondary signals, we identified another independent association with rs10770141 (OR=1.14;  $p=3\times 10^{-4}$ ) located at the promoter region of TH gene. This variant was previously reported in a gene-centric meta-analysis (41). When meta-analyzing our data with those of this study, rs10770141 resulted in a novel GWAS significant signal, which was independent of the first splice-site variant in *IGF2* (OR=1.08 (1.05-1.11);  $p=1.1\times 10^{-9}$ ) (Supplementary Figure 1).

We also used the fraction of the dataset for which we had exome-sequencing data in order to discard if rare variants with a strong effect size are the cause of a “synthetic association” (42), i. e. that rare variants with large effect size, are responsible for the association signal found in the common variant (rs149483638). For this purpose, we performed multiple regression analyses introducing the rare variants as covariates, to test if this caused a loss of the association signal in rs149483638. This analysis confirmed that we were not in front of a synthetic association, as at least 31 rare variants had to be excluded in order to dilute the signal of the rs149483638 variant (Supplementary Figure 3).

### *Credible set analysis*

The credible set analysis were constructed as described in (40). Briefly, for each association analyses results, we computed an approximate Bayes factor for each variant,

$$r = \frac{0.04}{se^2 + 0.04}$$

$$z = \text{beta}/se$$

## SUPPLEMENTARY DATA

*IGF2* loss-of-function T2D protective variant

$$abf = \frac{\sqrt{(1-r)}}{\exp\left(-r \times \frac{z^2}{2}\right)}$$

assuming that the prior on beta is Gaussian and variance 0.04. Then, a posterior probability for each variant was computed dividing the ABF by the total number of variants in the region. Then the cumulative posterior probability was computed and all the variants in the 95% credible set interval were selected and included in the credible set. Assuming that we had two independent signals in the *IGF2* region, we computed a first credible set conditioning on the two *KCNQ1* T2D associated variants (rs139647931 and rs2237897) and the rs4929965, and a second credible set conditioning on rs149483638 variant and the two *KCNQ1* T2D associated variants (rs139647931 and rs2237897). We selected all the variants that showed an r-squared higher than 0.1 with the top variants in each of the regions to compute the credible set analysis.

**References**

1. SIGMA Type 2 Diabetes Consortium, Williams AL, Jacobs SB, Moreno-Macias H, Huerta-Chagoya A, Churchhouse C, Marquez-Luna C, Garcia-Ortiz H, Gomez-Vazquez MJ, Burt NP, Aguilar-Salinas CA, Gonzalez-Villalpando C, Florez JC, Orozco L, Haiman CA, Tusie-Luna T, Altshuler D: Sequence variants in SLC16A11 are a common risk factor for type 2 diabetes in Mexico. *Nature* 2014;506:97-101
2. Estrada K, Aukrust I, Bjorkhaug L, Burt NP, Mercader JM, Garcia-Ortiz H, Huerta-Chagoya A, Moreno-Macias H, Walford G, Flannick J, Williams AL, Gomez-Vazquez MJ, Fernandez-Lopez JC, Martinez-Hernandez A, Centeno-Cruz F, Mendoza-Caamal E, Revilla-Monsalve C, Islas-Andrade S, Cordova EJ, Soberon X, Gonzalez-Villalpando ME, Henderson E, Wilkens LR, Le Marchand L, Arellano-Campos O, Ordonez-Sanchez ML, Rodriguez-Torres M, Rodriguez-Guillen R, Riba L, Najmi LA, Jacobs SB, Fennell T, Gabriel S, Fontanillas P, Hanis CL, Lehman DM, Jenkinson CP, Abboud HE, Bell GI, Cortes ML, Boehnke M, Gonzalez-Villalpando C, Orozco L, Haiman CA, Tusie-Luna T, Aguilar-Salinas CA, Altshuler D, Njolstad PR, Florez JC, MacArthur DG: Association of a low-frequency variant in HNF1A with type 2 diabetes in a Latino population. *JAMA* 2014;311:2305-2314
3. Kolonel LN, Henderson BE, Hankin JH, Nomura AM, Wilkens LR, Pike MC, Stram DO, Monroe KR, Earle ME, Nagamine FS: A multiethnic cohort in Hawaii and Los Angeles: baseline characteristics. *Am J Epidemiol* 2000;151:346-357
4. Hanson RL, Rong R, Kobes S, Muller YL, Weil EJ, Curtis JM, Nelson RG, Baier LJ: Role of Established Type 2 Diabetes-Susceptibility Genetic Variants in a High Prevalence American Indian Population. *Diabetes* 2015;64:2646-2657
5. Scott LJ, Mohlke KL, Bonnycastle LL, Willer CJ, Li Y, Duren WL, Erdos MR, Stringham HM, Chines PS, Jackson AU, Prokunina-Olsson L, Ding CJ, Swift AJ, Narisu N, Hu T, Pruim R, Xiao R, Li XY, Conneely KN, Riebow NL, Sprau AG, Tong M, White PP, Hetrick KN, Barnhart MW, Bark CW, Goldstein JL, Watkins L, Xiang F, Saramies J, Buchanan TA, Watanabe RM, Valle TT, Kinnunen L, Abecasis GR, Pugh EW, Doheny KF, Bergman RN, Tuomilehto J, Collins FS, Boehnke M: A genome-wide association study of type 2 diabetes in Finns detects multiple susceptibility variants. *Science* 2007;316:1341-1345
6. Stancakova A, Javorsky M, Kuulasmaa T, Haffner SM, Kuusisto J, Laakso M: Changes in insulin sensitivity and insulin release in relation to glycemia and glucose tolerance in 6,414 Finnish men. *Diabetes* 2009;58:1212-1221
7. Wichmann HE, Gieger C, Illig T, Group MKS: KORA-gen--resource for population genetics, controls and a broad spectrum of disease phenotypes. *Gesundheitswesen* 2005;67 Suppl 1:S26-30
8. Voight BF, Scott LJ, Steinthorsdottir V, Morris AP, Dina C, Welch RP, Zeggini E, Huth C, Aulchenko YS, Thorleifsson G, McCulloch LJ, Ferreira T, Grallert H, Amin N, Wu G, Willer CJ, Raychaudhuri S, McCarroll SA, Langenberg C, Hofmann OM, Dupuis J, Qi L, Segre AV, van Hoek M, Navarro P, Ardlie K, Balkau B, Benediktsson R, Bennett AJ, Blagieva R, Boerwinkle E, Bonnycastle LL, Bengtsson Bostrom K, Bravenboer B, Bumpstead S, Burt NP, Charpentier G, Chines PS, Cornelis M, Couper DJ, Crawford G, Doney AS, Elliott KS, Elliott AL, Erdos MR, Fox CS, Franklin CS, Ganser M, Gieger C, Grarup N, Green T, Griffin S, Groves CJ, Guiducci C, Hadjadj S, Hassanali N, Herder C, Isomaa B, Jackson AU, Johnson PR, Jorgensen T, Kao WH, Klopp N, Kong A, Kraft P, Kuusisto J, Lauritzen T, Li M, Lieveer A, Lindgren CM, Lyssenko V, Marre M, Meitinger T, Midthjell K, Morken MA, Narisu N, Nilsson P, Owen KR, Payne F, Perry JR, Petersen AK, Platou C, Proenca C, Prokopenko I, Rathmann W, Rayner NW, Robertson NR, Rocheleau G, Roden M, Sampson MJ, Saxena R, Shields BM, Shrader P, Sigurdsson G, Sparso T, Strassburger K, Stringham HM, Sun Q, Swift AJ, Thorand B, Tichet J, Tuomi T, van Dam RM, van Haften TW, van Herpt T, van Vliet-Ostaptchouk JV, Walters GB,

## SUPPLEMENTARY DATA

### *IGF2* loss-of-function T2D protective variant

- Weedon MN, Wijmenga C, Witteman J, Bergman RN, Cauchi S, Collins FS, Gloyn AL, Gyllenstein U, Hansen T, Hide WA, Hitman GA, Hofman A, Hunter DJ, Hveem K, Laakso M, Mohlke KL, Morris AD, Palmer CN, Pramstaller PP, Rudan I, Sijbrands E, Stein LD, Tuomilehto J, Uitterlinden A, Walker M, Wareham NJ, Watanabe RM, Abecasis GR, Boehm BO, Campbell H, Daly MJ, Hattersley AT, Hu FB, Meigs JB, Pankow JS, Pedersen O, Wichmann HE, Barroso I, Florez JC, Frayling TM, Groop L, Sladek R, Thorsteinsdottir U, Wilson JF, Illig T, Froguel P, van Duijn CM, Stefansson K, Altshuler D, Boehnke M, McCarthy MI, investigators M, Consortium G: Twelve type 2 diabetes susceptibility loci identified through large-scale association analysis. *Nat Genet* 2010;42:579-589
9. Wellcome Trust Case Control C: Genome-wide association study of 14,000 cases of seven common diseases and 3,000 shared controls. *Nature* 2007;447:661-678
10. Spector TD, Williams FM: The UK Adult Twin Registry (TwinsUK). *Twin research and human genetics : the official journal of the International Society for Twin Studies* 2006;9:899-906
11. Atzmon G, Hao L, Pe'er I, Velez C, Pearlman A, Palamara PF, Morrow B, Friedman E, Oddoux C, Burns E, Ostrer H: Abraham's children in the genome era: major Jewish diaspora populations comprise distinct genetic clusters with shared Middle Eastern Ancestry. *Am J Hum Genet* 2010;86:850-859
12. Berglund G, Elmstahl S, Janzon L, Larsson SA: The Malmo Diet and Cancer Study. Design and feasibility. *Journal of internal medicine* 1993;233:45-51
13. Berglund G, Nilsson P, Eriksson KF, Nilsson JA, Hedblad B, Kristenson H, Lindgarde F: Long-term outcome of the Malmo preventive project: mortality and cardiovascular morbidity. *Journal of internal medicine* 2000;247:19-29
14. Bog-Hansen E, Lindblad U, Bengtsson K, Ranstam J, Melander A, Rastam L: Risk factor clustering in patients with hypertension and non-insulin-dependent diabetes mellitus. The Skaraborg Hypertension Project. *Journal of internal medicine* 1998;243:223-232
15. Groop L, Forsblom C, Lehtovirta M, Tuomi T, Karanko S, Nissen M, Ehrnstrom BO, Forsen B, Isomaa B, Snickars B, Taskinen MR: Metabolic consequences of a family history of NIDDM (the Botnia study): evidence for sex-specific parental effects. *Diabetes* 1996;45:1585-1593
16. Isomaa B, Forsen B, Lahti K, Holmstrom N, Waden J, Matintupa O, Almgren P, Eriksson JG, Lysenko V, Taskinen MR, Tuomi T, Groop LC: A family history of diabetes is associated with reduced physical fitness in the Prevalence, Prediction and Prevention of Diabetes (PPP)-Botnia study. *Diabetologia* 2010;53:1709-1713
17. Lindholm E, Agardh E, Tuomi T, Groop L, Agardh CD: Classifying diabetes according to the new WHO clinical stages. *European journal of epidemiology* 2001;17:983-989
18. Lysenko V, Jonsson A, Almgren P, Pulizzi N, Isomaa B, Tuomi T, Berglund G, Altshuler D, Nilsson P, Groop L: Clinical risk factors, DNA variants, and the development of type 2 diabetes. *The New England journal of medicine* 2008;359:2220-2232
19. Parker A, Meyer J, Lewitzky S, Rennich JS, Chan G, Thomas JD, Orho-Melander M, Lehtovirta M, Forsblom C, Hyrkkö A, Carlsson M, Lindgren C, Groop LC: A gene conferring susceptibility to type 2 diabetes in conjunction with obesity is located on chromosome 18p11. *Diabetes* 2001;50:675-680
20. Yu H, Bowden DW, Spray BJ, Rich SS, Freedman BI: Linkage analysis between loci in the renin-angiotensin axis and end-stage renal disease in African Americans. *Journal of the American Society of Nephrology : JASN* 1996;7:2559-2564
21. Chahal NS, Lim TK, Jain P, Chambers JC, Kooner JS, Senior R: Does subclinical atherosclerosis burden identify the increased risk of cardiovascular disease mortality among United Kingdom Indian Asians? A population study. *American heart journal* 2011;162:460-466
22. Chahal NS, Lim TK, Jain P, Chambers JC, Kooner JS, Senior R: Ethnicity-related differences in left ventricular function, structure and geometry: a population study of UK Indian Asian and European white subjects. *Heart* 2010;96:466-471

## SUPPLEMENTARY DATA

### *IGF2* loss-of-function T2D protective variant

23. Lavanya R, Jeganathan VS, Zheng Y, Raju P, Cheung N, Tai ES, Wang JJ, Lamoureux E, Mitchell P, Young TL, Cajucom-Uy H, Foster PJ, Aung T, Saw SM, Wong TY: Methodology of the Singapore Indian Chinese Cohort (SICC) eye study: quantifying ethnic variations in the epidemiology of eye diseases in Asians. *Ophthalmic epidemiology* 2009;16:325-336
24. Cho YS, Go MJ, Kim YJ, Heo JY, Oh JH, Ban HJ, Yoon D, Lee MH, Kim DJ, Park M, Cha SH, Kim JW, Han BG, Min H, Ahn Y, Park MS, Han HR, Jang HY, Cho EY, Lee JE, Cho NH, Shin C, Park T, Park JW, Lee JK, Cardon L, Clarke G, McCarthy MI, Lee JY, Lee JK, Oh B, Kim HL: A large-scale genome-wide association study of Asian populations uncovers genetic factors influencing eight quantitative traits. *Nat Genet* 2009;41:527-534
25. Tan CE, Emmanuel SC, Tan BY, Jacob E: Prevalence of diabetes and ethnic differences in cardiovascular risk factors. The 1992 Singapore National Health Survey. *Diabetes Care* 1999;22:241-247
26. Hughes K, Yeo PP, Lun KC, Thai AC, Sothy SP, Wang KW, Cheah JS, Phoon WO, Lim P: Cardiovascular diseases in Chinese, Malays, and Indians in Singapore. II. Differences in risk factor levels. *Journal of epidemiology and community health* 1990;44:29-35
27. Hughes K, Aw TC, Kuperan P, Choo M: Central obesity, insulin resistance, syndrome X, lipoprotein(a), and cardiovascular risk in Indians, Malays, and Chinese in Singapore. *Journal of epidemiology and community health* 1997;51:394-399
28. Mitchell BD, Kammerer CM, Blangero J, Mahaney MC, Rainwater DL, Dyke B, Hixson JE, Henkel RD, Sharp RM, Comuzzie AG, VandeBerg JL, Stern MP, MacCluer JW: Genetic and environmental contributions to cardiovascular risk factors in Mexican Americans. The San Antonio Family Heart Study. *Circulation* 1996;94:2159-2170
29. Hunt KJ, Lehman DM, Arya R, Fowler S, Leach RJ, Goring HHH, Almasy L, Blangero J, Dyer TD, Duggirala R, Stern MP: Genome-wide linkage analyses of type 2 diabetes in Mexican Americans - The San Antonio Family Diabetes/Gallbladder Study. *Diabetes* 2005;54:2655-2662
30. Coletta DK, Schneider J, Hu SL, Dyer TD, Puppala S, Farook VS, Arya R, Lehman DM, Blangero J, DeFronzo RA, Duggirala R, Jenkinson CP: Genome-wide linkage scan for genes influencing plasma triglyceride levels in the Veterans Administration Genetic Epidemiology Study. *Diabetes* 2009;58:279-284
31. Knowler WC, Coresh J, Elston RC, Freedman BI, Iyengar SK, Kimmel PL, Olson JM, Plaetke R, Sedor JR, Seldin MF, Family Investigation of N, Diabetes Research G: The Family Investigation of Nephropathy and Diabetes (FIND): design and methods. *Journal of diabetes and its complications* 2005;19:1-9
32. Hanis CL, Ferrell RE, Barton SA, Aguilar L, Garza-Ibarra A, Tulloch BR, Garcia CA, Schull WJ: Diabetes among Mexican Americans in Starr County, Texas. *American journal of epidemiology* 1983;118:659-672
33. Kosoy R, Nassir R, Tian C, White PA, Butler LM, Silva G, Kittles R, Alarcon-Riquelme ME, Gregersen PK, Belmont JW, De La Vega FM, Seldin MF: Ancestry informative marker sets for determining continental origin and admixture proportions in common populations in America. *Human mutation* 2009;30:69-78
34. Horvath S, Xu X, Laird NM: The family based association test method: strategies for studying general genotype--phenotype associations. *Eur J Hum Genet* 2001;9:301-306
35. Knowler WC, Barrett-Connor E, Fowler SE, Hamman RF, Lachin JM, Walker EA, Nathan DM: Reduction in the incidence of type 2 diabetes with lifestyle intervention or metformin. *The New England journal of medicine* 2002;346:393-403
36. Kvale MN, Hesselton S, Hoffmann TJ, Cao Y, Chan D, Connell S, Croen LA, Dispensa BP, Eshragh J, Finn A, Gollub J, Iribarren C, Jorgenson E, Kushi LH, Lao R, Lu Y, Ludwig D, Mathauda GK, McGuire WB, Mei G, Miles S, Mittman M, Patil M, Quesenberry CP, Jr., Ranatunga D, Rowell S, Sadler M,



## SUPPLEMENTARY DATA

### *IGF2* loss-of-function T2D protective variant

Sakoda LC, Shapero M, Shen L, Shenoy T, Smethurst D, Somkin CP, Van Den Eeden SK, Walter L, Wan E, Webster T, Whitmer RA, Wong S, Zau C, Zhan Y, Schaefer C, Kwok PY, Risch N: Genotyping Informatics and Quality Control for 100,000 Subjects in the Genetic Epidemiology Research on Adult Health and Aging (GERA) Cohort. *Genetics* 2015;200:1051-1060

37. Delaneau O, Marchini J, Zagury JF: A linear complexity phasing method for thousands of genomes. *Nature methods* 2012;9:179-181

38. Genomes Project C, Auton A, Brooks LD, Durbin RM, Garrison EP, Kang HM, Korbel JO, Marchini JL, McCarthy S, McVean GA, Abecasis GR: A global reference for human genetic variation. *Nature* 2015;526:68-74

39. Goldstein JI, Crenshaw A, Carey J, Grant GB, Maguire J, Fromer M, O'Dushlaine C, Moran JL, Chambert K, Stevens C, Swedish Schizophrenia C, Consortium AAS, Sklar P, Hultman CM, Purcell S, McCarroll SA, Sullivan PF, Daly MJ, Neale BM: zCall: a rare variant caller for array-based genotyping: genetics and population analysis. *Bioinformatics* 2012;28:2543-2545

40. Wakefield J: A Bayesian measure of the probability of false discovery in genetic epidemiology studies. *Am J Hum Genet* 2007;81:208-227

41. Saxena R, Elbers CC, Guo Y, Peter I, Gaunt TR, Mega JL, Lanktree MB, Tare A, Castillo BA, Li YR, Johnson T, Bruinenberg M, Gilbert-Diamond D, Rajagopalan R, Voight BF, Balasubramanyam A, Barnard J, Bauer F, Baumert J, Bhangale T, Boehm BO, Braund PS, Burton PR, Chandrupatla HR, Clarke R, Cooper-DeHoff RM, Crook ED, Davey-Smith G, Day IN, de Boer A, de Groot MC, Drenos F, Ferguson J, Fox CS, Furlong CE, Gibson Q, Gieger C, Gilhuijs-Pederson LA, Glessner JT, Goel A, Gong Y, Grant SF, Grobbee DE, Hastie C, Humphries SE, Kim CE, Kivimaki M, Kleber M, Meisinger C, Kumari M, Langa TY, Lawlor DA, Li M, Lobbmeyer MT, Maitland-van der Zee AH, Meijs MF, Molony CM, Morrow DA, Murugesan G, Musani SK, Nelson CP, Newhouse SJ, O'Connell JR, Padmanabhan S, Palmen J, Patel SR, Pepine CJ, Pettinger M, Price TS, Rafelt S, Ranchalis J, Rasheed A, Rosenthal E, Ruczinski I, Shah S, Shen H, Silbernagel G, Smith EN, Spijkerman AW, Stanton A, Steffes MW, Thorand B, Trip M, van der Harst P, van der AD, van Iperen EP, van Setten J, van Vliet-Ostapchouk JV, Verweij N, Wolffenbuttel BH, Young T, Zafarmand MH, Zmuda JM, Look ARG, consortium D, Boehnke M, Altshuler D, McCarthy M, Kao WH, Pankow JS, Cappola TP, Sever P, Poulter N, Caulfield M, Dominiczak A, Shields DC, Bhatt DL, Zhang L, Curtis SP, Danesh J, Casas JP, van der Schouw YT, Onland-Moret NC, Doevendans PA, Dorn GW, 2nd, Farrall M, FitzGerald GA, Hamsten A, Hegele R, Hingorani AD, Hofker MH, Huggins GS, Illig T, Jarvik GP, Johnson JA, Klungel OH, Knowler WC, Koenig W, Marz W, Meigs JB, Melander O, Munroe PB, Mitchell BD, Bielinski SJ, Rader DJ, Reilly MP, Rich SS, Rotter JI, Saleheen D, Samani NJ, Schadt EE, Shuldiner AR, Silverstein R, Kottke-Marchant K, Talmud PJ, Watkins H, Asselbergs FW, de Bakker PI, McCaffery J, Wijmenga C, Sabatine MS, Wilson JG, Reiner A, Bowden DW, Hakonarson H, Siscovick DS, Keating BJ: Large-scale gene-centric meta-analysis across 39 studies identifies type 2 diabetes loci. *Am J Hum Genet* 2012;90:410-425

42. Dickson SP, Wang K, Krantz I, Hakonarson H, Goldstein DB: Rare variants create synthetic genome-wide associations. *PLoS Biol* 8:e1000294

# Supplementary Figure 1

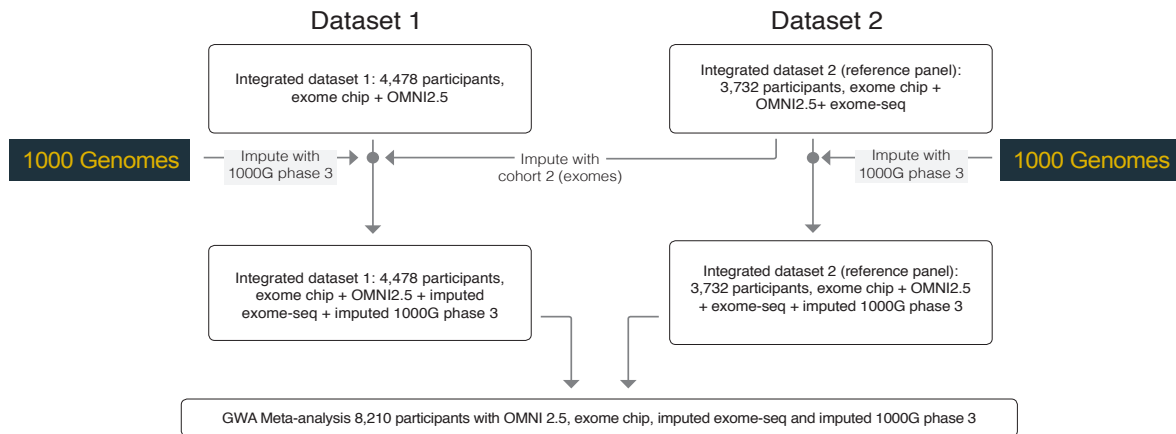

# Supplementary Figure 2

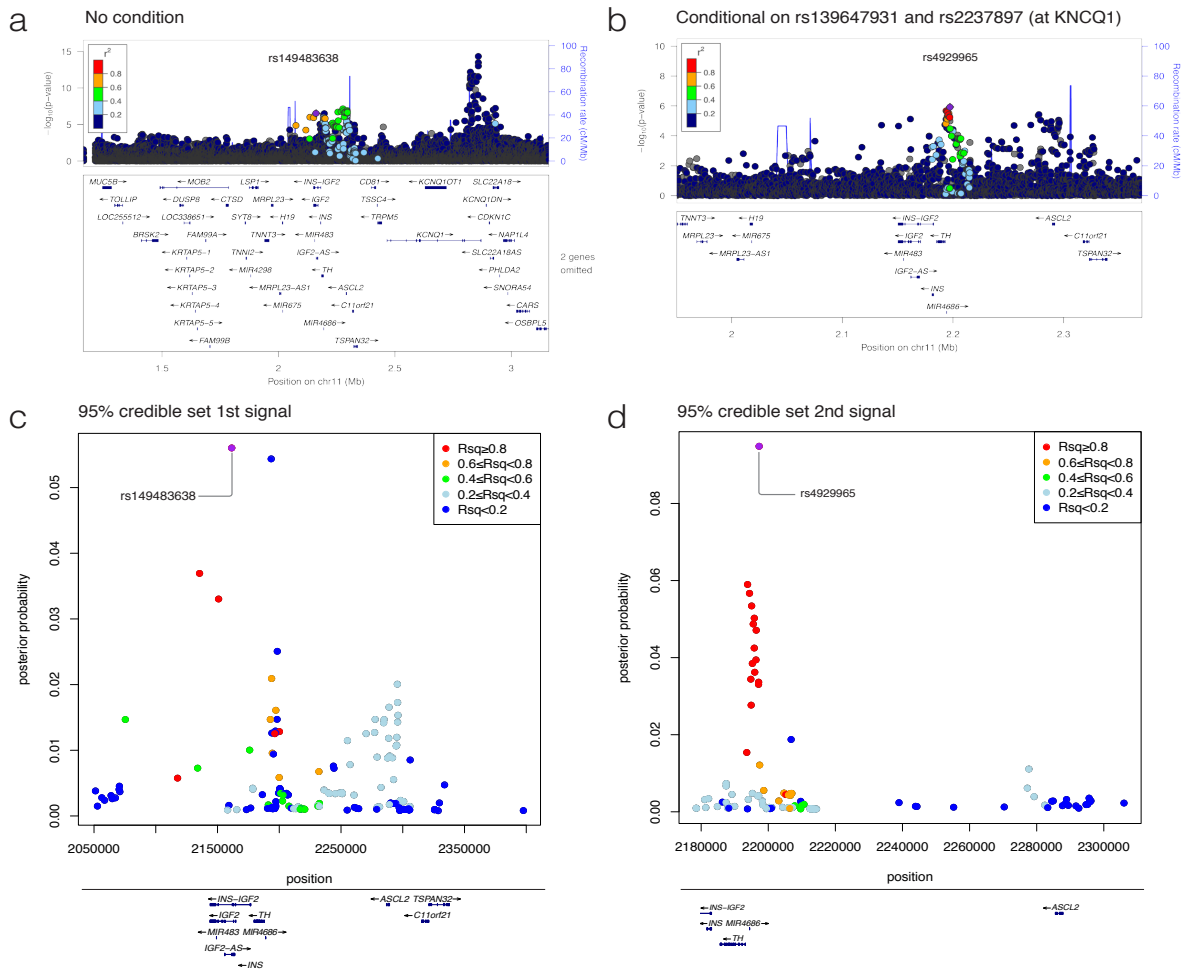

# Supplementary Figure 3

# Supplementary Figure 4

Protective haplotype association after joint conditional testing

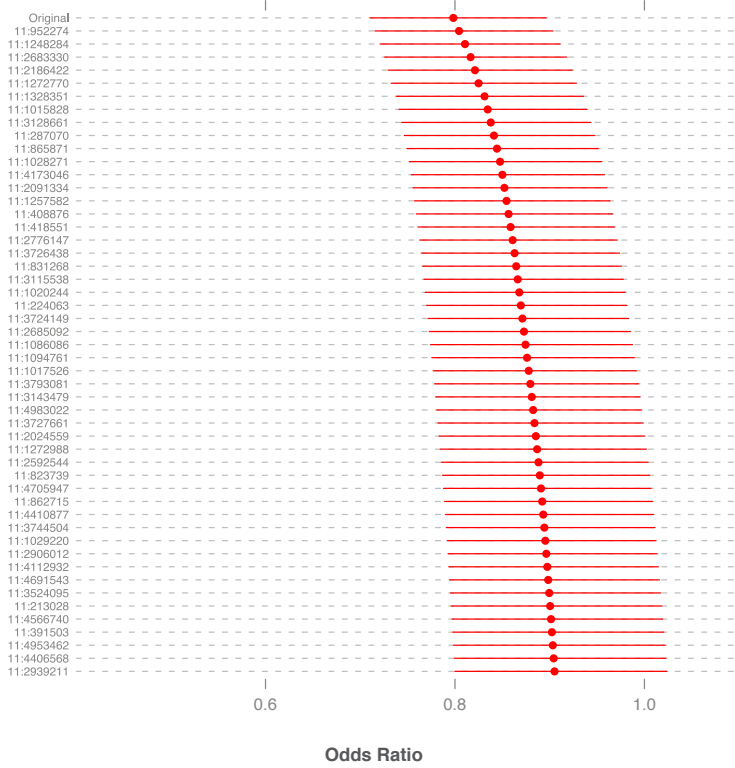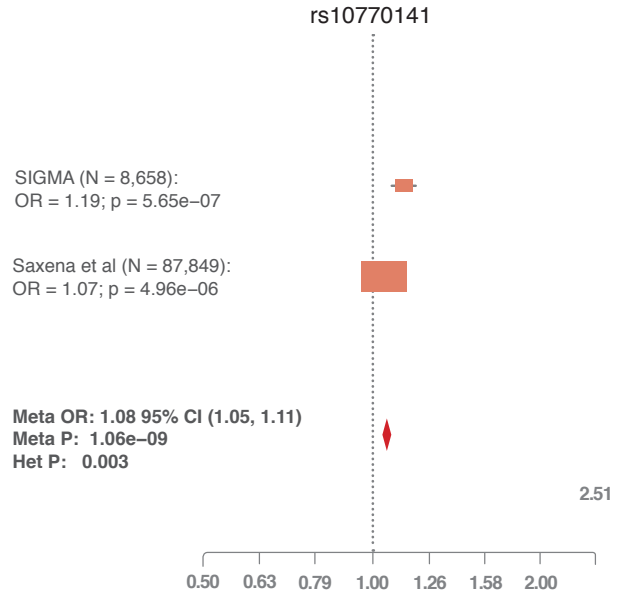

# Supplementary Figure 5

a

GTEx (adult tissues)

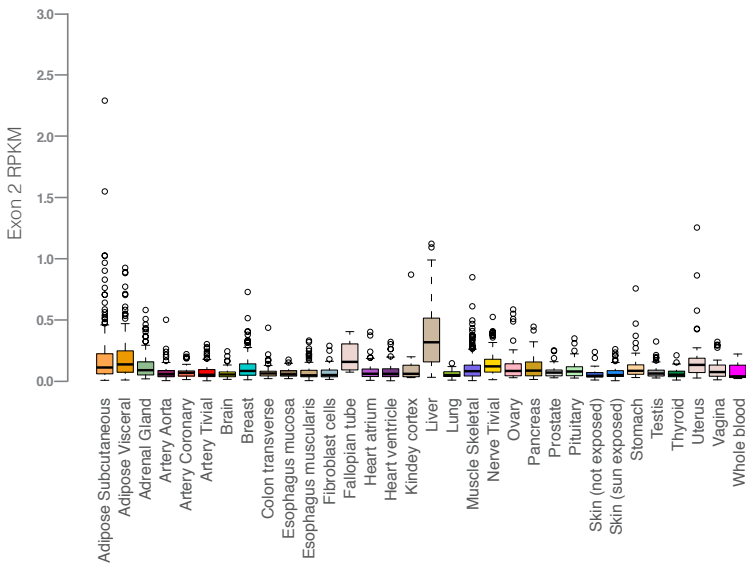

b

ESC - derived embryonic progenitors and adult islets

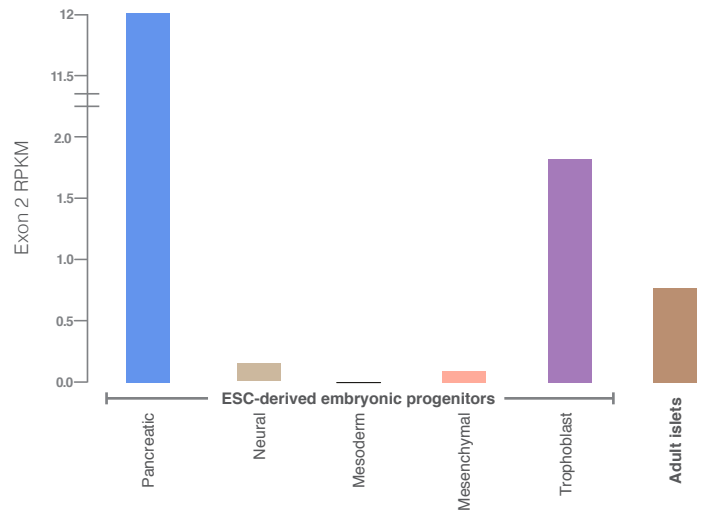

# Supplementary Figure 6

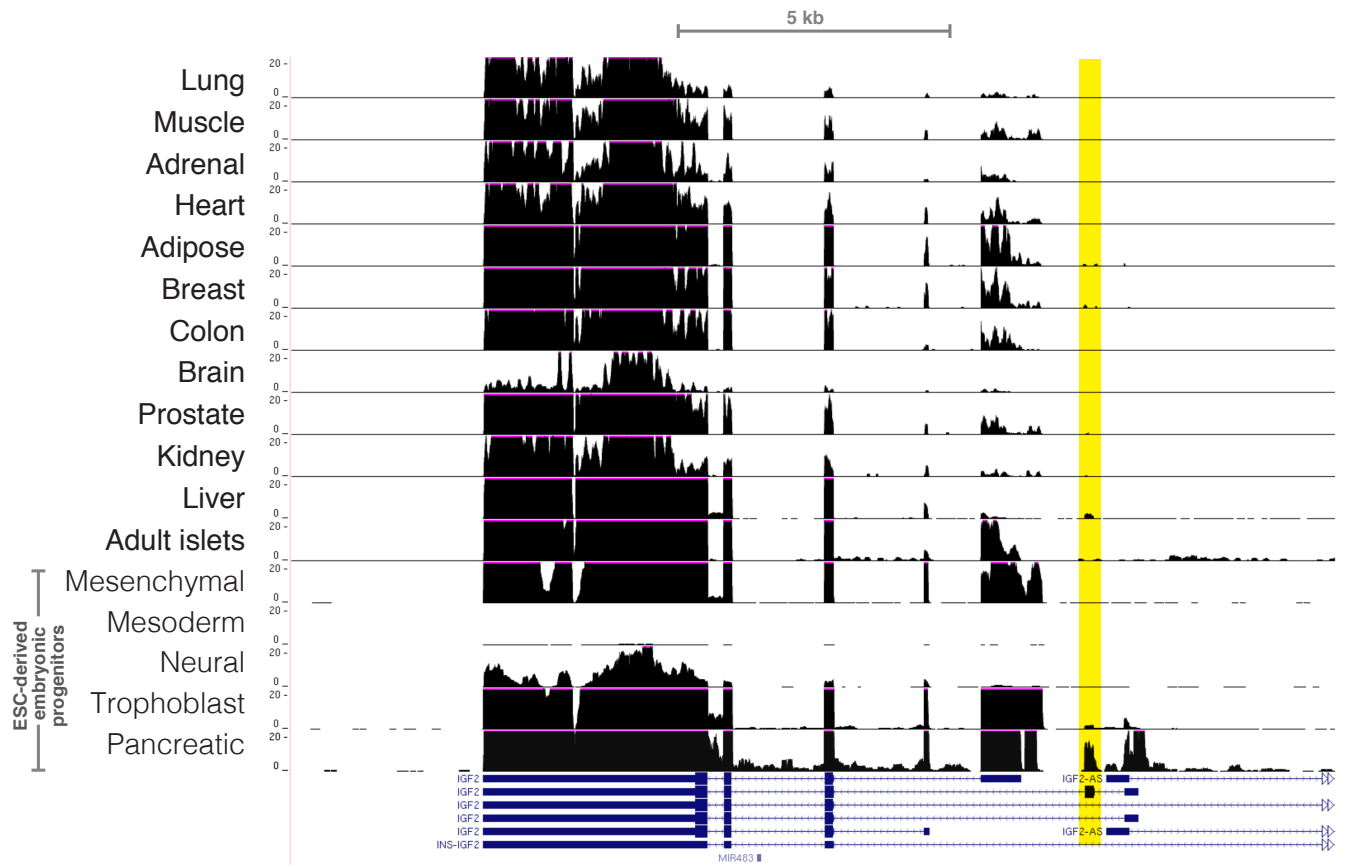

# Supplementary Figure 7

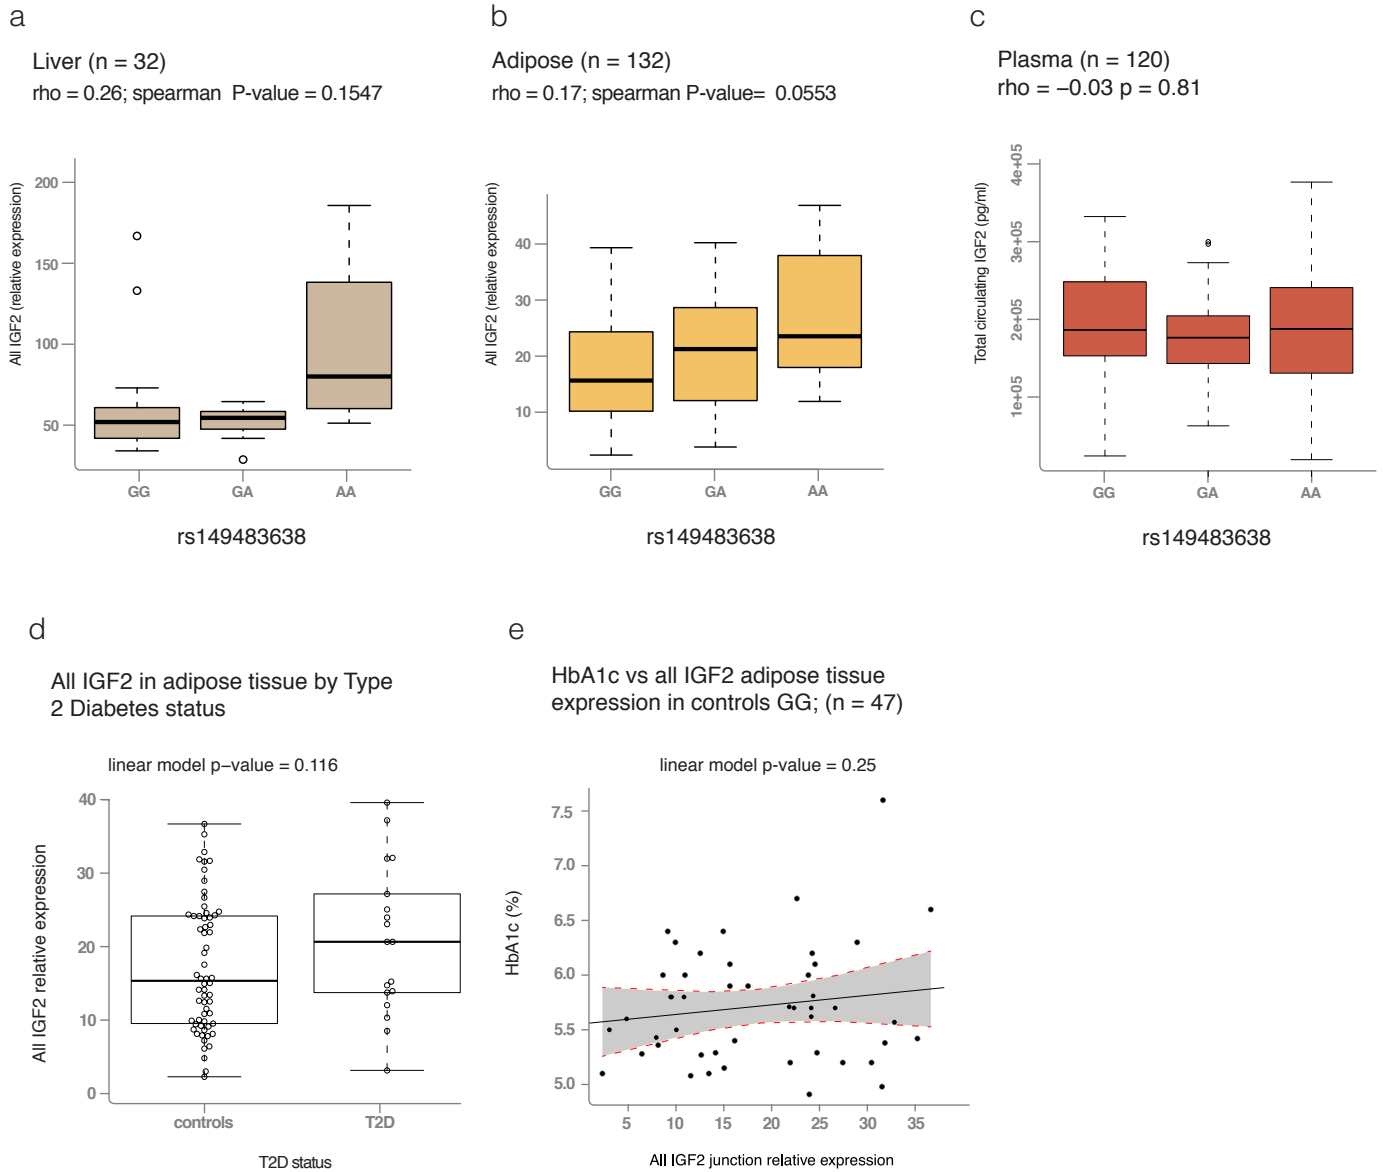

# Supplementary Figure 8

rs149483638

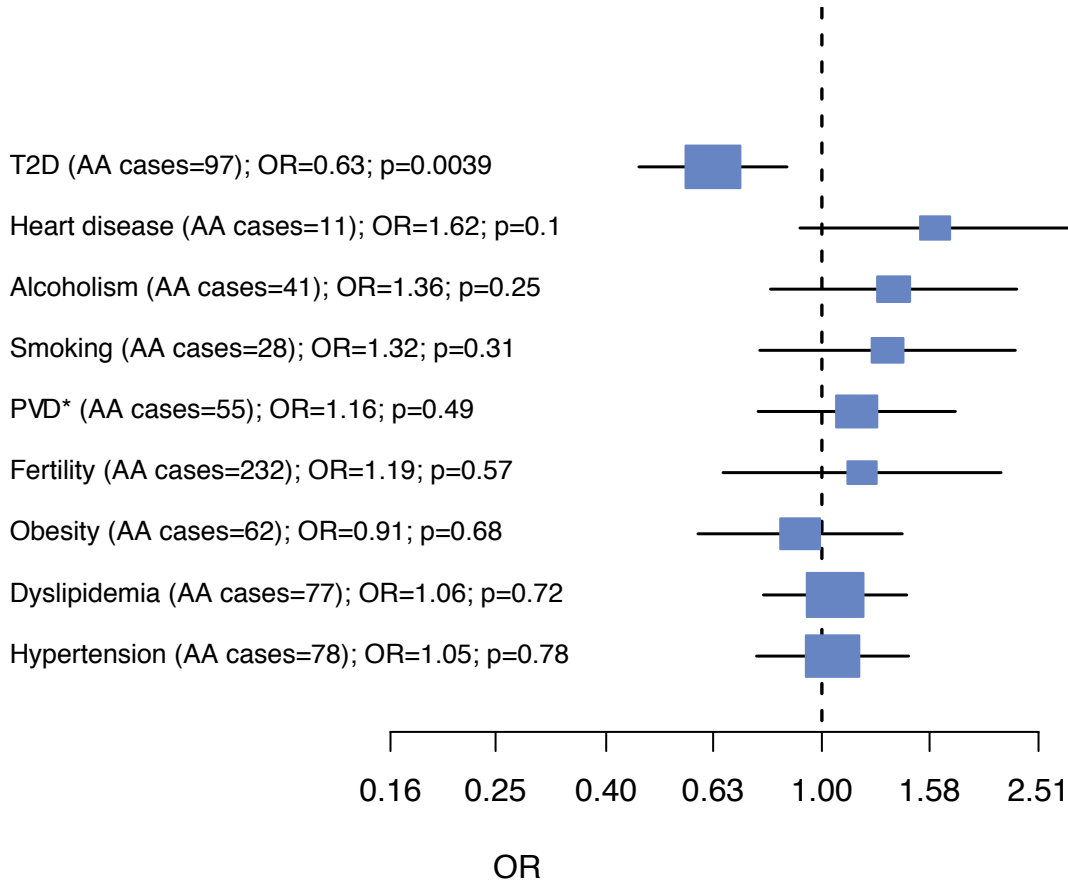

SUPPLEMENTARY DATA

**Supplementary Table 1:** Top hits identified by exome chip association analysis. Odds ratios and p-values were derived by Wald's test, after adjusting for BMI, the first 10 principal components to adjust for population stratification and body mass index (BMI), age and sex. Directional consistency with previous studies is also represented.

| rsid        | Chr | Position  | Closest Gene    | Consequence                         | Reference Allele | Alternative Allele | MAF Affected | MAF Unaffected | Number Effective Samples | Odds Ratio Wald Test adjusted | p-value Wald Test corrected | Odds ratio directionally consistent? |
|-------------|-----|-----------|-----------------|-------------------------------------|------------------|--------------------|--------------|----------------|--------------------------|-------------------------------|-----------------------------|--------------------------------------|
| rs7903146   | 10  | 114758349 | <i>TCF7L2</i>   | intron variant                      | C                | T                  | 0.24         | 0.20           | 8622                     | 1.38                          | 4.76E-17                    | +                                    |
| rs7901695   | 10  | 114754088 | <i>TCF7L2</i>   | intron variant                      | T                | C                  | 0.25         | 0.22           | 8622                     | 1.31                          | 5.03E-13                    | +                                    |
| rs4506565   | 10  | 114756041 | <i>TCF7L2</i>   | intron variant                      | A                | T                  | 0.25         | 0.22           | 8617                     | 1.31                          | 6.63E-13                    | +                                    |
| rs12243326  | 10  | 114788815 | <i>TCF7L2</i>   | intron variant                      | T                | C                  | 0.19         | 0.17           | 8622                     | 1.31                          | 6.23E-11                    | +                                    |
| rs2237892   | 11  | 2839751   | <i>KCNQ1</i>    | intron variant                      | C                | T                  | 0.26         | 0.29           | 8622                     | 0.80                          | 2.46E-10                    | +                                    |
| rs13342692  | 17  | 6946287   | <i>SLC16A11</i> | missense variant                    | T                | C                  | 0.35         | 0.29           | 8622                     | 1.24                          | 4.75E-10                    | +                                    |
| rs117767867 | 17  | 6946330   | <i>SLC16A11</i> | missense variant<br>splice acceptor | C                | T                  | 0.33         | 0.27           | 8620                     | 1.22                          | 7.33E-09                    | +                                    |
| rs149483638 | 11  | 2161530   | <i>INS-IGF2</i> | variant                             | C                | T                  | 0.17         | 0.18           | 8622                     | 0.80                          | 1.36E-07                    | novel                                |
| rs849134    | 7   | 28196222  | <i>JAZF1</i>    | intron variant                      | A                | G                  | 0.32         | 0.37           | 8622                     | 0.84                          | 2.63E-07                    | +                                    |
| rs864745    | 7   | 28180556  | <i>JAZF1</i>    | intron variant                      | T                | C                  | 0.32         | 0.37           | 8610                     | 0.85                          | 3.97E-07                    | +                                    |
| rs1635852   | 7   | 28189411  | <i>JAZF1</i>    | intron variant                      | T                | C                  | 0.32         | 0.37           | 8611                     | 0.85                          | 6.49E-07                    | +                                    |
| rs2184898   | 10  | 119418104 | <i>EMX2</i>     | -                                   | G                | A                  | 0.25         | 0.23           | 8613                     | 1.20                          | 1.12E-06                    | novel                                |
| rs2237895   | 11  | 2857194   | <i>KCNQ1</i>    | intron variant                      | A                | C                  | 0.47         | 0.43           | 8622                     | 1.16                          | 2.86E-06                    | +                                    |
| rs1421085   | 16  | 53800954  | <i>FTO</i>      | intron variant                      | T                | C                  | 0.23         | 0.21           | 8621                     | 1.18                          | 1.48E-05                    | +                                    |
| rs1558902   | 16  | 53803574  | <i>FTO</i>      | intron variant                      | T                | A                  | 0.23         | 0.21           | 8621                     | 1.18                          | 1.59E-05                    | +                                    |

SUPPLEMENTARY DATA

**Supplementary Table 2.** Quantitative trait association results for rs149483638 in the discovery cohorts. P-values and effect sizes, and standard error of rs149483638-G allele with quantitative traits in non-diabetic individuals are represented.

| Trait                    | Effective sample size | MAF    | additive <i>p</i> -value | additive beta | additive S.E. beta |
|--------------------------|-----------------------|--------|--------------------------|---------------|--------------------|
| Fasting Glucose          | 2215                  | 0.2043 | 0.3                      | 0.0057        | 0.0053             |
| Fasting Insulin          | 1515                  | 0.2071 | 0.8                      | -0.0100       | 0.0381             |
| 2-hour glucose challenge | 535                   | 0.1998 | 0.3                      | 0.0413        | 0.0392             |
| Glycated Hemoglobin      | 544                   | 0.1998 | 0.1                      | 0.0649        | 0.0418             |
| Cholesterol              | 2210                  | 0.2043 | 0.5                      | 0.0249        | 0.0348             |
| LDLC                     | 1522                  | 0.2066 | 0.9                      | -0.0050       | 0.0427             |
| HDLC                     | 1597                  | 0.2053 | 0.8                      | -0.0105       | 0.0437             |
| TG                       | 2210                  | 0.2043 | 0.8                      | 0.0396        | 0.0297             |
| BMI                      | 4364                  | 0.1862 | 0.2                      | 0.0382        | 0.0272             |

LDLC: low-density lipoprotein cholesterol, HDLC: High-density lipoprotein cholesterol, TG: Triglycerides, BMI: Body Mass Index



SUPPLEMENTARY DATA

**Supplementary Table 3.** Variants in linkage disequilibrium with rs149483638 (R-squared higher than 0.5) and their predicted functional impact

| rsid        | chr:position(bp) | Allele1 | Allele2 | R-squared with top variant | postProb | Variant Effect Predictor (most severe consequence) |          |              |
|-------------|------------------|---------|---------|----------------------------|----------|----------------------------------------------------|----------|--------------|
|             |                  |         |         |                            |          | Consequence                                        | IMPACT   | SYMBOL       |
| rs149483638 | chr11:2161530    | T       | C       | 1.000                      | 0.056    | splice_acceptor_variant                            | HIGH     | IGF2         |
| rs144656014 | chr11:2135474    | A       | G       | 0.823                      | 0.037    | intergenic_variant                                 | MODIFIER | -            |
| rs11564732  | chr11:2150895    | T       | C       | 0.852                      | 0.033    | 3_prime_UTR_variant                                | MODIFIER | IGF2         |
| rs10840490  | chr11:2193817    | C       | G       | 0.619                      | 0.021    | upstream_gene_variant                              | MODIFIER | TH   MIR4686 |
| rs34779113  | chr11:2197234    | G       | GC      | 0.625                      | 0.016    | regulatory_region_variant                          | MODIFIER | TH   MIR4686 |
| rs10840489  | chr11:2192798    | T       | C       | 0.602                      | 0.015    | intron_variant                                     | MODIFIER | TH   MIR4686 |
| rs146043837 | chr11:2075378    | A       | C       | 0.550                      | 0.015    | intergenic_variant                                 | MODIFIER | -            |
| rs187839678 | chr11:2200156    | T       | C       | 0.841                      | 0.013    | regulatory_region_variant                          | MODIFIER | -            |
| rs192912194 | chr11:2196425    | A       | G       | 0.854                      | 0.013    | upstream_gene_variant                              | MODIFIER | TH   MIR4686 |
| rs10840491  | chr11:2194390    | A       | G       | 0.630                      | 0.010    | regulatory_region_variant                          | MODIFIER | TH   MIR4686 |
| rs140996354 | chr11:2232137    | T       | C       | 0.703                      | 0.007    | regulatory_region_variant                          | MODIFIER | -            |
| rs11042982  | chr11:2199963    | C       | G       | 0.603                      | 0.006    | regulatory_region_variant                          | MODIFIER | -            |
| rs80089797  | chr11:2117677    | T       | C       | 0.826                      | 0.006    | intergenic_variant                                 | MODIFIER | -            |
| rs6578993   | chr11:2201163    | T       | C       | 0.595                      | 0.003    | intergenic_variant                                 | MODIFIER | -            |
| rs11043001  | chr11:2203045    | A       | G       | 0.569                      | 0.003    | intergenic_variant                                 | MODIFIER | -            |
| rs7126800   | chr11:2202668    | A       | C       | 0.586                      | 0.002    | intergenic_variant                                 | MODIFIER | -            |
| rs7925375   | chr11:2191155    | T       | C       | 0.531                      | 0.002    | intron_variant                                     | MODIFIER | TH   MIR4686 |
| rs12224088  | chr11:2217358    | C       | G       | 0.507                      | 0.001    | intergenic_variant                                 | MODIFIER | -            |
| rs147580690 | chr11:2216970    | CA      | C       | 0.515                      | 0.001    | regulatory region variant                          | MODIFIER | -            |

**Supplementary Table 4.** Association results for each of the cohorts and meta-analysis using both inverse-variance fixed effects model and sample size model.

| <b>Dataset</b>      | <b>N</b> | <b>OR (95% CI)</b>  | <b>p-value</b>         |
|---------------------|----------|---------------------|------------------------|
| <b>SIGMA</b>        | 8,658    | 0.8 (0.74-0.87)     | 1.14x10 <sup>-7</sup>  |
| <b>Pima</b>         | 3,199    | 0.68 (0.57-0.81)    | 1.09x10 <sup>-05</sup> |
| <b>SAFS*</b>        | 2,982    | Z = -2.3            | 0.021                  |
| <b>T2D-GENES-HS</b> | 1,924    | 0.89 (0.7-1.13)     | 0.326                  |
| <b>DMS2</b>         | 1,228    | 0.71 (0.58-0.88)    | 0.001                  |
| <b>GERA</b>         | 5,896    | 0.82 (0.64-1.05)    | 0.11                   |
| <b>DPP*</b>         | 616      | HR=0.76 (0.49-1.20) | 0.24                   |

  

|                            | <b>OR (95%CI)</b> | <b>Z-score</b> | <b>P-value</b>         |
|----------------------------|-------------------|----------------|------------------------|
| <b>METAL (IVFE)</b>        | 0.78 (0.73-0.84)  | -              | 5.61x10 <sup>-14</sup> |
| <b>METAL (SAMPLE SIZE)</b> | -                 | -7.53          | 4.78x10 <sup>-14</sup> |

\*SAFS were analyzed by a family-based association test (FBAT) and were not included in the inverse-variance fixed effects meta-analyses. Since diabetes incidence in the DPP was computed by Hazard Ratios (HR), the results from the DPP were only included in the sample size meta-analysis.

SUPPLEMENTARY DATA

**Supplementary Table 5.** Family-based association analysis in the San Antonio Families Study

| Marker       | Allele | afreq | fam# | S-E(S)  | Var(S)  | Z      | p    |
|--------------|--------|-------|------|---------|---------|--------|------|
| rs11564732** | A      | 0.13  | 283  | -35.259 | 234.871 | -2.301 | 0.02 |

\*Residuals were computed after regressing out the age+age<sup>2</sup>+BMI.

\*\*rs11564732\* was used as a proxy for rs149483638 (Rsq= 0.85, 10.6 kb). A allele in rs11564732 co-segregates with the T allele in rs149483638

SUPPLEMENTARY DATA

**Supplementary Table 6.** Association of human knockouts for isoform 2 of *IGF2* (AA homozygous) with other diseases or clinical outcomes.

| Clinical Outcome            | OR   | Odds Ratio (95%CI) | P      | HetTest | cohorts tested* | total AA cases | total AA controls | total GG cases | total GG controls |
|-----------------------------|------|--------------------|--------|---------|-----------------|----------------|-------------------|----------------|-------------------|
| T2D Status                  | 0.63 | 0.63 (0.46-0.86)   | 0.0039 | 0.19    | DMS1+DMS2+GERA  | 97             | 195               | 1534           | 4873              |
| Dyslipidemia                | 1.06 | 1.06 (0.78-1.43)   | 0.72   | 0.69    | DMS1+DMS2+GERA  | 77             | 210               | 3096           | 3281              |
| Fertility                   | 1.19 | 1.19 (0.66-2.14)   | 0.57   | 0.82    | DMS1+DMS2       | 232            | 24                | 914            | 263               |
| Heart disease               | 1.62 | 1.62 (0.91-2.87)   | 0.1    | 0.24    | DMS1+DMS2+GERA  | 11             | 273               | 1200           | 5133              |
| Hypertension                | 1.05 | 1.05 (0.76-1.44)   | 0.78   | 0.029   | DMS1+DMS2+GERA  | 78             | 210               | 2970           | 3427              |
| Obesity                     | 0.91 | 0.91 (0.59-1.41)   | 0.68   | 0.13    | DMS1+DMS2       | 62             | 178               | 320            | 644               |
| Peripheral Vascular Disease | 1.16 | 1.16 (0.76-1.76)   | 0.49   | 0.078   | DMS1+DMS2       | 55             | 192               | 241            | 856               |
| Smoking                     | 1.32 | 1.32 (0.77-2.27)   | 0.31   | 0.79    | DMS1+DMS2       | 28             | 220               | 182            | 923               |

\*The results were meta-analyzed, when possible with all the available cohorts with that clinical outcome available. Association analyses were corrected for age, BMI, and sex, and the first two principal components to correct for population stratification. Inverse-variant fixed effects meta-analysis was performed. Only clinical conditions with at least 10 AA carriers are presented.

SUPPLEMENTARY DATA

**Supplementary table 7.** Association of rs149483638 variant with other diseases assessed in the Genetic Epidemiology Research on Aging (GERA). Effect sizes are considering the A allele as effect allele.

| Clinical condition           | cases (n) | controls (n) | cases MAF | controls MAF | p-value               | OR   |
|------------------------------|-----------|--------------|-----------|--------------|-----------------------|------|
| Varicose veins               | 259       | 5637         | 0.07      | 0.06         | 0.506                 | 1.15 |
| Cancer                       | 1127      | 4769         | 0.04      | 0.06         | 0.522                 | 0.92 |
| Cardiovascular disease       | 1300      | 4596         | 0.05      | 0.06         | 0.844                 | 0.98 |
| Depression                   | 887       | 5009         | 0.05      | 0.06         | 0.954                 | 0.99 |
| Dermatophytosis              | 997       | 4899         | 0.07      | 0.06         | 0.760                 | 1.03 |
| Type 2 diabetes              | 8,227     | 12,966       | 0.17      | 0.18         | 5.6x10 <sup>-14</sup> | 0.78 |
| Dyslipidemia                 | 3149      | 2747         | 0.06      | 0.06         | 0.701                 | 0.96 |
| Hemorrhoids                  | 974       | 4922         | 0.06      | 0.06         | 0.500                 | 1.08 |
| Hernia abdominopelvic cavity | 557       | 5339         | 0.06      | 0.06         | 0.388                 | 1.15 |
| Hypertensive Disease         | 2921      | 2975         | 0.06      | 0.06         | 0.988                 | 1.00 |
| Insomnia                     | 390       | 5506         | 0.05      | 0.06         | 0.876                 | 1.03 |
| Iron deficiency anemias      | 299       | 5597         | 0.07      | 0.06         | 0.277                 | 1.23 |
| Irritable bowel syndrome     | 362       | 5534         | 0.04      | 0.06         | 0.006                 | 0.53 |
| Macular Degeneration         | 225       | 5671         | 0.04      | 0.06         | 0.616                 | 0.86 |
| Osteoarthritis               | 1961      | 3935         | 0.05      | 0.06         | 0.705                 | 1.04 |
| Osteoporosis                 | 450       | 5446         | 0.05      | 0.06         | 0.810                 | 0.96 |
| Psychiatric: any             | 1154      | 4742         | 0.06      | 0.06         | 0.439                 | 1.09 |
| Peripheral Vascular Disease  | 347       | 5549         | 0.05      | 0.06         | 0.834                 | 1.05 |
| Acute reaction to stress     | 662       | 5234         | 0.06      | 0.06         | 0.591                 | 1.08 |

\* Association analyses were corrected for age, BMI, and sex, and the first two principal components to correct for population stratification. For type 2 diabetes, the meta-analysis results of the discovery and replication cohorts are presented.

**The T2D-GENES Consortium:**

The Broad Genomics Platform<sup>1</sup>, Gonçalo Abecasis<sup>2</sup>, Marcio Almeida<sup>3</sup>, David Altshuler<sup>4,5,6,7,8,9,10</sup>, Jennifer L. Asimit<sup>11</sup>, Gil Atzmon<sup>12</sup>, Mathew Barber<sup>13</sup>, Nicola L. Beer<sup>14</sup>, Graeme I. Bell<sup>13,15</sup>, Jennifer Below<sup>16</sup>, Tom Blackwell<sup>2</sup>, John Blangero<sup>3</sup>, Michael Boehnke<sup>2</sup>, Donald W. Bowden<sup>17,18,19,20</sup>, Noël Burt<sup>4</sup>, John Chambers<sup>21,22,23</sup>, Han Chen<sup>24</sup>, Peng Chen<sup>25</sup>, Peter S. Chines<sup>26</sup>, Sungkyoung Choi<sup>27</sup>, Claire Churchhouse<sup>4</sup>, Pablo Cingolani<sup>28</sup>, Belinda K. Cornes<sup>29</sup>, Nancy Cox<sup>13,15</sup>, Aaron G. Day-Williams<sup>11</sup>, Ravindranath Duggirala<sup>3</sup>, Josée Dupuis<sup>24</sup>, Thomas Dyer<sup>3</sup>, Shuang Feng<sup>2</sup>, Juan Fernandez-Tajes<sup>30</sup>, Teresa Ferreira<sup>30</sup>, Tasha E. Fingerlin<sup>31</sup>, Jason Flannick<sup>4,6</sup>, Jose Florez<sup>4,6,7</sup>, Pierre Fontanillas<sup>4</sup>, Timothy M. Frayling<sup>32</sup>, Christian Fuchsberger<sup>2</sup>, Eric R. Gamazon<sup>15</sup>, Kyle Gaulton<sup>30</sup>, Saurabh Ghosh, Anna Gloyn<sup>14</sup>, Robert L. Grossman<sup>15,33</sup>, Jason Grundstad<sup>33</sup>, Craig Hanis<sup>16</sup>, Allison Heath<sup>33</sup>, Heather Highland<sup>16</sup>, Momoko Hirokoshi<sup>30</sup>, Ik-Soo Huh<sup>27</sup>, Jeroen R. Huyghe<sup>2</sup>, Kamran Ikram<sup>34,29,35,36</sup>, Kathleen A. Jablonski<sup>37</sup>, Young Jin Kim<sup>38</sup>, Goo Jun<sup>2</sup>, Norihiro Kato<sup>39</sup>, Jayoun Kim<sup>27</sup>, C. Ryan King<sup>40</sup>, Jaspal Kooner<sup>22,23,41</sup>, Min Seok Kwon<sup>27</sup>, Hae Kyung Im<sup>40</sup>, Markku Laakso<sup>42</sup>, Kevin Koi-Yau Lam<sup>25</sup>, Jaehoon Lee<sup>27</sup>, Selyeong Lee<sup>27</sup>, Sungyoung Lee<sup>27</sup>, Donna M. Lehman<sup>43</sup>, Heng Li<sup>4</sup>, Cecilia M. Lindgren<sup>30</sup>, Xuanyao Liu<sup>25,44</sup>, Oren E. Livne<sup>13</sup>, Adam E. Locke<sup>2</sup>, Anubha Mahajan<sup>30</sup>, Julian B. Maller<sup>30,45</sup>, Alisa K. Manning<sup>4</sup>, Taylor J. Maxwell<sup>16</sup>, Alexander Mazouze<sup>46</sup>, Mark I. McCarthy<sup>30,14,47</sup>, James B. Meigs<sup>7,48</sup>, Byungju Min<sup>27</sup>, Karen L. Mohlke<sup>49</sup>, Andrew Morris<sup>50</sup>, Solomon Musani<sup>51</sup>, Yoshihiko Nagai<sup>46</sup>, Maggie C.Y. Ng<sup>17,18</sup>, Dan Nicolae<sup>13,15,52</sup>, Sohee Oh<sup>27</sup>, Nicholette Palmer<sup>17,18,19</sup>, Taesung Park<sup>27</sup>, Toni I. Pollin<sup>53</sup>, Inga Prokopenko<sup>30,54</sup>, David Reich<sup>4,5</sup>, Manuel A. Rivas<sup>30</sup>, Laura J. Scott<sup>2</sup>, Mark Seielstad<sup>55</sup>, Yoon Shin Cho<sup>56</sup>, E-Shyong Tai<sup>34,25,57</sup>, Xueling Sim<sup>2</sup>, Robert Sladek<sup>46,58</sup>, Philip Smith<sup>59</sup>, Ioanna Tachmazidou<sup>11</sup>, Tanya M. Teslovich<sup>2</sup>, Jason Torres<sup>13,15</sup>, Vasily Trubetskoy<sup>13,15</sup>, Sara M. Willems<sup>60</sup>, Amy L. Williams<sup>4,5</sup>, James G. Wilson<sup>61</sup>, Steven Wiltshire<sup>62</sup>, Sungho Won<sup>63</sup>, Andrew R. Wood<sup>32</sup>, Wang Xu<sup>57</sup>, Yik Ying Teo<sup>64,65,66,67,68</sup>, Joon Yoon<sup>27</sup>, Jong-Young Lee<sup>69</sup>, Matthew Zawistowski<sup>2</sup>, Eleftheria Zeggini<sup>11</sup>, Weihua Zhang<sup>21</sup>, Sebastian Zöllner<sup>2,70</sup>

<sup>1</sup>The Genomics Platform, The Broad Institute of Harvard and MIT, Cambridge, Massachusetts 02142, USA.

<sup>2</sup>Department of Biostatistics, Center for Statistical Genetics, University of Michigan, Ann Arbor, Michigan 48109, USA.

<sup>3</sup>Department of Genetics, Texas Biomedical Research Institute, San Antonio, Texas 78227, USA.

<sup>4</sup>Program in Medical and Population Genetics, Broad Institute of Harvard and MIT, Cambridge, Massachusetts 02142, USA.

<sup>5</sup>Department of Genetics, Harvard Medical School, Boston, Massachusetts 02115, USA.

<sup>6</sup>Center for Human Genetic Research and Diabetes Research Center (Diabetes Unit), Massachusetts General Hospital, Boston 02114, Massachusetts, USA.

<sup>7</sup>Department of Medicine, Harvard Medical School, Boston, Massachusetts 02115, USA.

## SUPPLEMENTARY DATA

- <sup>8</sup>Center for Human Genetic Research, Massachusetts General Hospital, Boston, Massachusetts 02114, USA.
- <sup>9</sup>Department of Molecular Biology, Harvard Medical School, Boston, Massachusetts 02114, USA.
- <sup>10</sup>Department of Biology, Massachusetts Institute of Technology, Cambridge, Massachusetts 02139, USA.
- <sup>11</sup>Wellcome Trust Sanger Institute, Hinxton, Cambridge, CB10 1HH, UK.
- <sup>12</sup>Department of Medicine, Department of Genetics, Albert Einstein College of Medicine, Bronx, New York 10461, USA.
- <sup>13</sup>Department of Human Genetics, University of Chicago, Chicago, Illinois 60637, USA.
- <sup>14</sup>Oxford Centre for Diabetes, Endocrinology and Metabolism, University of Oxford, Oxford, OX3 7LJ, UK.
- <sup>15</sup>Department of Medicine, University of Chicago, Chicago, Illinois 60637, USA.
- <sup>16</sup>Human Genetics Center, University of Texas Health Science Center at Houston, Houston, Texas 77030, USA.
- <sup>17</sup>Center for Genomics and Personalized Medicine Research, Wake Forest School of Medicine, Winston- Salem, North Carolina 27157, USA.
- <sup>18</sup>Center for Diabetes Research, Wake Forest School of Medicine, Winston-Salem, North Carolina 27157, USA.
- <sup>19</sup>Department of Biochemistry, Wake Forest School of Medicine, Winston-Salem, North Carolina 27157, USA.
- <sup>20</sup>Internal Medicine-Endocrinology, Wake Forest School of Medicine, Winston-Salem, North Carolina 27157, USA.
- <sup>21</sup>Department of Epidemiology and Biostatistics, Imperial College London, London SW7 2AZ, UK.
- <sup>22</sup>Imperial College Healthcare NHS Trust, London W2 1NY, UK.
- <sup>23</sup>Ealing Hospital National Health Service (NHS) Trust, Middlesex UB1 3HW, UK.
- <sup>24</sup>Department of Biostatistics, Boston University School of Public Health, Boston, Massachusetts 02115, USA.
- <sup>25</sup>Saw Swee Hock School of Public Health, National University of Singapore, Singapore 117597, Singapore.
- <sup>26</sup>National Human Genome Research Institute, National Institutes of Health, Bethesda, MD 20892, USA.
- <sup>27</sup>Seoul National University, Seoul 110-799, South Korea.
- <sup>28</sup>McGill Centre for Bioinformatics, McGill University, Montréal, Quebec, H3G 0B1, Canada.
- <sup>29</sup>Singapore Eye Research Institute, Singapore National Eye Centre, Singapore 168751, Singapore.
- <sup>30</sup>Wellcome Trust Centre for Human Genetics, University of Oxford, Oxford OX3 7BN, UK.
- <sup>31</sup>Department of Epidemiology, Colorado School of Public Health, Aurora, Colorado 80045, USA.
- <sup>32</sup>Genetics of Complex Traits, University of Exeter Medical School, Exeter, EX4 4SB UK.
- <sup>33</sup>Institute for Genomics and Systems Biology, University of Chicago, Chicago,

## SUPPLEMENTARY DATA

Illinois 60637, USA.

<sup>34</sup>Duke National University of Singapore Graduate Medical School, Singapore 169857, Singapore.

<sup>35</sup>Department of Ophthalmology, National University of Singapore and National University Health System, Singapore 119228, Singapore.

<sup>36</sup>Department of Ophthalmology, Erasmus Medical Center, Rotterdam 3000 CA, the Netherlands.

<sup>37</sup>The Biostatistics Center, George Washington University, Rockville, Maryland 20852, USA.

<sup>38</sup>Department of Neurology, Konkuk University School of Medicine, Seoul 143-701, South Korea.

<sup>39</sup>Department of Gene Diagnostics and Therapeutics, Research Institute, National Center for Global Health and Medicine, Tokyo 162-8655, Japan.

<sup>40</sup>Department of Health Studies, University of Chicago, Chicago, Illinois 60637, USA.

<sup>41</sup>National Heart and Lung Institute (NHLI), Imperial College London, Hammersmith Hospital, London W12 0HS, UK.

<sup>42</sup> Department of Medicine, University of Eastern Finland, Kuopio Campus and Kuopio University Hospital, FI-70211 Kuopio, Finland.

<sup>43</sup>Division of Clinical Epidemiology, Department of Medicine, University of Texas Health Science Center at San Antonio, San Antonio, Texas 78229, USA.

<sup>44</sup>Graduate School for Integrative Science and Engineering, National University of Singapore, Singapore 117456, Singapore.

<sup>45</sup>Department of Statistics, University of Oxford, Oxford, OX1 3TG UK.

<sup>46</sup>McGill University, Montréal, Québec H3A 0G4, Canada.

<sup>47</sup>Oxford NIHR Biomedical Research Centre, Churchill Hospital, Headington OX3 7LE, UK.

<sup>48</sup>General Medicine Division, Massachusetts General Hospital, Boston, Massachusetts 02114, USA.

<sup>49</sup>Department of Genetics, University of North Carolina-Chapel Hill, Chapel Hill, North Carolina 27599, USA.

<sup>50</sup>Department of Genetic Medicine, Manchester Academic Health Sciences Centre, Manchester M13 9NT, UK.

<sup>51</sup>Department of Medicine, University of Mississippi Medical Center, Jackson, Mississippi 39126, USA.

<sup>52</sup>Department of Statistics, University of Chicago, Chicago, Illinois 60637, USA.

<sup>53</sup>Department of Medicine, Program for Personalized and Genomic Medicine, University of Maryland School of Medicine, Baltimore, Maryland 21201, USA.

<sup>54</sup>Department of Medical Sciences, Molecular Epidemiology and Science for Life Laboratory, Uppsala University, 751 05 Uppsala, Sweden.

<sup>55</sup>University of California San Francisco, San Francisco, California 94143, USA.

<sup>56</sup>Department of Biomedical Science, Hallym University, Chuncheon, Gangwon-do, 200-702 South Korea.

<sup>57</sup>Department of Medicine, Yong Loo Lin School of Medicine, National University of Singapore, Singapore 117597, Singapore.

<sup>58</sup>Department of Medicine, Royal Victoria Hospital, Montréal, Québec H3A 1A1, Canada.

<sup>59</sup>National Institute of Diabetes and Digestive and Kidney Disease, National Institutes of Health, Bethesda, MD 20817, USA.



## SUPPLEMENTARY DATA

<sup>60</sup>Department of Genetic Epidemiology, Erasmus Medical Center, Rotterdam 3000 CA, the Netherlands.

<sup>61</sup>Department of Physiology and Biophysics, University of Mississippi Medical Center, Jackson, Mississippi 39216, USA.

<sup>62</sup>Centre for Medical Research, Western Australian Institute for Medical Research, The University of Western Australia, Nedlands WA 6008, Australia.

<sup>63</sup>Chung-Ang University, Seoul 156-756, South Korea.

<sup>64</sup>Department of Epidemiology and Public Health, National University of Singapore, Singapore 117597, Singapore.

<sup>65</sup>Centre for Molecular Epidemiology, National University of Singapore, Singapore 117456, Singapore.

<sup>66</sup>Genome Institute of Singapore, Agency for Science, Technology and Research, Singapore 138672, Singapore.

<sup>67</sup>Graduate School for Integrative Science and Engineering, National University of Singapore, Singapore 117456, Singapore.

<sup>68</sup>Department of Statistics and Applied Probability, National University of Singapore, Singapore 117546, Singapore.

<sup>69</sup>Center for Genome Science, Korea National Institute of Health, Osong Health Technology Administration Complex, Chungcheongbuk-do, 363-951, South Korea.

<sup>70</sup>Department of Psychiatry, University of Michigan, Ann Arbor, Michigan 48109, USA.

### **DPP Research Group Investigators:**

#### ***Pennington Biomedical Research Center (Baton Rouge, LA)***

George A. Bray, MD\*

Iris W. Culbert, BSN, RN, CCRC\*\*

Catherine M. Champagne, PhD, RD

Barbara Eberhardt, RD, LDN

Frank Greenway, MD

Fonda G. Guillory, LPN

April A. Herbert, RD

Michael L. Jeffers, LPN

Betty M. Kennedy, MPA

Jennifer C. Lovejoy, PhD

Laura H. Morris, BS

Lee E. Melancon, BA, BS

Donna Ryan, MD

Deborah A. Sanford, LPN

Kenneth G. Smith, BS, MT

Lisa L. Smith, BS

Julia A. St.Amant, RTR

Richard T. Tulley, PhD

Paula C. Vicknair, MS, RD

Donald Williamson, PhD

Jeffery J. Zachwieja, PhD

#### ***University of Chicago (Chicago, IL)***

Kenneth S. Polonsky, MD\*

Janet Tobian, MD, PhD\*

David Ehrmann, MD\*

## SUPPLEMENTARY DATA

Margaret J. Matulik, RN, BSN\*\*

Bart Clark, MD

Kirsten Czech, MS

Catherine DeSandre, BA

Ruthanne Hilbrich, RD

Wylie McNabb, EdD

Ann R. Semenske, MS, RD

**Jefferson Medical College (Philadelphia, PA)**

Jose F. Caro, MD\*

Pamela G. Watson, RN, ScD\*

Barry J. Goldstein, MD, PhD\*

Kellie A. Smith, RN, MSN\*\*

Jewel Mendoza, RN, BSN\*\*

Renee Liberoni, MPH

Constance Pepe, MS, RD

John Spandorfer, MD

**University of Miami (Miami, FL)**

Richard P. Donahue, PhD\*

Ronald B. Goldberg, MD\*

Ronald Prineas, MD, PhD\*

Patricia Rowe, MPA\*\*

Jeanette Calles, MEd

Paul Cassanova-Romero, MD

Hermes J. Florez, MD

Anna Giannella, RD, MS

Lascelles Kirby, MS

Carmen Larreal

Valerie McLymont, RN

Jadell Mendez

Juliet Ojito, RN

Arlette Perry, PhD

Patrice Saab, PhD

**The University of Texas Health Science Center (San Antonio, TX)**

Steven M. Haffner, MD, MPH\*

Maria G. Montez, RN, MSHP, CDE\*\*

Carlos Lorenzo, MD, PhD

Arlene Martinez, RN, BSN, CDE

**University of Colorado (Denver, CO)**

Richard F. Hamman, MD, DrPH\*

Patricia V. Nash, MS\*\*

Lisa Testaverde, MS\*\*

Denise R. Anderson, RN, BSN

Larry B. Ballonoff, MD

Alexis Bouffard, MA,

B. Ned Calonge, MD, MPH

Lynne Delve

Martha Farago, RN

James O. Hill, PhD

Shelley R. Hoyer, BS

Bonnie T. Jortberg, MS, RD, CDE

Dione Lenz, RN, BSN

Marsha Miller, MS, RD

David W. Price, MD

Judith G. Regensteiner, PhD

SUPPLEMENTARY DATA

Helen Seagle, MS, RD  
Carissa M. Smith, BS  
Sheila C. Steinke, MS  
Brent VanDorsten, PhD

**Joslin Diabetes Center (Boston, MA)**

Edward S. Horton, MD\*  
Kathleen E. Lawton, RN\*\*  
Ronald A. Arky, MD  
Marybeth Bryant  
Jacqueline P. Burke, BSN  
Enrique Caballero, MD  
Karen M. Callaphan, BA  
Om P. Ganda, MD  
Therese Franklin  
Sharon D. Jackson, MS, RD, CDE  
Alan M. Jacobsen, MD  
Lyn M. Kula, RD  
Margaret Kocal, RN, CDE  
Maureen A. Malloy, BS  
Maryanne Nicosia, MS, RD  
Cathryn F. Oldmixon, RN  
Jocelyn Pan, BS, MPH  
Marizel Quitingon  
Stacy Rubtchinsky, BS  
Ellen W. Seely, MD  
Dana Schweizer, BSN  
Donald Simonson, MD  
Fannie Smith, MD  
Caren G. Solomon, MD, MPH  
James Warram, MD

**VA Puget Sound Health Care System and University of Washington (Seattle, WA)**

Steven E. Kahn, MB, ChB\*  
Brenda K. Montgomery, RN, BSN, CDE\*\*  
Wilfred Fujimoto, MD  
Robert H. Knopp, MD  
Edward W. Lipkin, MD  
Michelle Marr, BA  
Dace Trence, MD

**University of Tennessee (Memphis, TN)**

Abbas E. Kitabchi, PhD, MD, FACP\*  
Mary E. Murphy, RN, MS, CDE, MBA\*\*  
William B. Applegate, MD, MPH  
Michael Bryer-Ash, MD  
Sandra L. Frieson, RN  
Raed Imseis, MD  
Helen Lambeth, RN, BSN  
Lynne C. Lichtermann, RN, BSN  
Hooman Oktaei, MD  
Lily M.K. Rutledge, RN, BSN  
Amy R. Sherman, RD, LD  
Clara M. Smith, RD, MHP, LDN  
Judith E. Soberman, MD  
Beverly Williams-Cleaves, MD

**Northwestern University's Feinberg School of Medicine (Chicago, IL)**

## SUPPLEMENTARY DATA

Boyd E. Metzger, MD\*  
Mariana K. Johnson, MS, RN\*\*  
Catherine Behrends  
Michelle Cook, MS  
Marian Fitzgibbon, PhD  
Mimi M. Giles, MS, RD  
Deloris Heard, MA  
Cheryl K.H. Johnson, MS, RN

Diane Larsen, BS  
Anne Lowe, BS  
Megan Lyman, BS  
David McPherson, MD  
Mark E. Molitch, MD  
Thomas Pitts, MD  
Renee Reinhart, RN, MS  
Susan Roston, RN, RD  
Pamela A. Schinleber, RN, MS

### ***Massachusetts General Hospital (Boston, MA)***

David M. Nathan, MD\*  
Charles McKittrick, BSN\*\*  
Heather Turgeon, BSN\*\*  
Kathy Abbott  
Ellen Anderson, MS, RD  
Laurie Bissett, MS, RD  
Enrico Cagliero, MD  
Jose C. Florez, MD, PhD+  
Linda Delahanty, MS, RD  
Valerie Goldman, MS, RD  
Alexandra Poulos

### ***University of California-San Diego (San Diego, CA)***

Jerrold M. Olefsky, MD\*  
Mary Lou Carrion-Petersen, RN, BSN\*\*  
Elizabeth Barrett-Connor, MD  
Steven V. Edelman, MD  
Robert R. Henry, MD  
Javiva Horne, RD  
Simona Szerdi Janesch, BA  
Diana Leos, RN, BSN  
Sundar Mudaliar, MD  
William Polonsky, PhD  
Jean Smith, RN  
Karen Vejvoda, RN, BSN, CDE, CCRC

### ***St. Luke's-Roosevelt Hospital (New York, NY)***

F. Xavier Pi-Sunyer, MD\*  
Jane E. Lee, MS\*\*  
David B. Allison, PhD  
Nancy J. Aronoff, MS, RD  
Jill P. Crandall, MD  
Sandra T. Foo, MD  
Carmen Pal, MD  
Kathy Parkes, RN  
Mary Beth Pena, RN  
Ellen S. Rooney, BA  
Gretchen E.H. Van Wye, MA

SUPPLEMENTARY DATA

Kristine A. Viscovich, ANP

**Indiana University (Indianapolis, IN)**

David G. Marrero, PhD\*

Melvin J. Prince, MD\*

Susie M. Kelly, RN, CDE\*\*

Yolanda F. Dotson, BS

Edwin S. Fineberg, MD

John C. Guare, PhD

Angela M. Hadden

James M. Ignaut, MA

Marcia L. Jackson

Marion S. Kirkman, MD

Kieren J. Mather, MD

Beverly D. Porter, MSN

Paris J. Roach, MD

Nancy D. Rowland, BS, MS

Madelyn L. Wheeler, RD

**Medstar Research Institute (Washington, DC)**

Robert E. Ratner, MD\*

Gretchen Youssef, RD, CDE\*\*

Sue Shapiro, RN, BSN, CCRC\*\*

Catherine Bavido-Arrage, MS, RD, LD

Geraldine Boggs, MSN, RN

Marjorie Bronsord, MS, RD, CDE

Ernestine Brown

Wayman W. Cheatham, MD

Susan Cola

Cindy Evans

Peggy Gibbs

Tracy Kellum, MS, RD, CDE

Claresa Levatan, MD

Asha K. Nair, BS

Maureen Passaro, MD

Gabriel Uwaifo, MD

**University of Southern California/UCLA Research Center (Alhambra, CA)**

Mohammed F. Saad, MD\*

Maria Budget\*\*

Sujata Jinagouda, MD\*\*

Khan Akbar, MD

Claudia Conzues

Perpetua Magpuri

Kathy Ngo

Amer Rassam, MD

Debra Waters

Kathy Xaphthalmous

**Washington University (St. Louis, MO)**

Julio V. Santiago, MD\* (deceased)

Samuel Dagogo-Jack, MD, MSc, FRCP, FACP\*

Neil H. White, MD, CDE\*

Samia Das, MS, MBA, RD, LD\*\*

Ana Santiago, RD\*\*

Angela Brown, MD

Edwin Fisher, PhD

Emma Hurt, RN

SUPPLEMENTARY DATA

Tracy Jones, RN  
Michelle Kerr, RD  
Lucy Ryder, RN  
Cormarie Wernimont, MS, RD  
***Johns Hopkins School of Medicine (Baltimore, MD)***

Christopher D. Saudek, MD\*  
Vanessa Bradley, BA\*\*  
Emily Sullivan, MEd, RN\*\*  
Tracy Whittington, BS\*\*  
Caroline Abbas  
Frederick L. Brancati, MD, MHS  
Jeanne M. Clark, MD  
Jeanne B. Charleston, RN, MSN  
Janice Freel  
Katherine Horak, RD  
Dawn Jiggetts  
Deloris Johnson  
Hope Joseph  
Kimberly Loman  
Henry Mosley  
Richard R. Rubin, PhD  
Alafia Samuels, MD  
Kerry J. Stewart, EdD  
Paula Williamson

***University of New Mexico (Albuquerque, NM)***

David S. Schade, MD\*  
Karwyn S. Adams, RN, MSN\*\*  
Carolyn Johannes, RN, CDE\*\*  
Leslie F. Adler, PhD  
Patrick J. Boyle, MD  
Mark R. Burge, MD  
Janene L. Canady, RN, CDE  
Lisa Chai, RN  
Ysela Gonzales, RN, MSN  
Doris A. Hernandez-McGinnis  
Patricia Katz, LPN  
Carolyn King  
Amer Rassam, MD  
Sofya Rubinchik, MD  
Willette Senter, RD  
Debra Waters, PhD

***Albert Einstein College of Medicine (Bronx, NY)***

Harry Shamoon, MD\*  
Janet O. Brown, RN, MPH, MSN\*\*  
Elsie Adorno, BS  
Liane Cox, MS, RD  
Jill Crandall, MD  
Helena Duffy, MS, C-ANP  
Samuel Engel, MD  
Allison Friedler, BS  
Crystal J. Howard-Century, MA  
Stacey Kloiber, RN  
Nadege Longchamp, LPN  
Helen Martinez, RN, MSN, FNP-C

SUPPLEMENTARY DATA

Dorothy Pompei, BA  
Jonathan Scheindlin, MD  
Elissa Violino, RD, MS  
Elizabeth Walker, RN, DNSc, CDE  
Judith Wylie-Rosett, EdD, RD  
Elise Zimmerman, RD, MS  
Joel Zonszein, MD

**University of Pittsburgh (Pittsburgh, PA)**

Trevor Orchard, MD\*  
Rena R. Wing, PhD\*  
Gaye Koenning, MS, RD\*\*  
M. Kaye Kramer, BSN, MPH\*\*  
Susan Barr, BS  
Miriam Boraz  
Lisa Clifford, BS  
Rebecca Culyba, BS  
Marlene Frazier  
Ryan Gilligan, BS  
Susan Harrier, MLT  
Louann Harris, RN  
Susan Jeffries, RN, MSN  
Andrea Kriska, PhD  
Qurashia Manjoo, MD  
Monica Mullen, MHP, RD  
Alicia Noel, BS  
Amy Otto, PhD  
Linda Semler, MS, RD  
Cheryl F. Smith, PhD  
Marie Smith, RN, BSN  
Elizabeth Venditti, PhD  
Valarie Weinzierl, BS  
Katherine V. Williams, MD, MPH  
Tara Wilson, BA

**University of Hawaii (Honolulu, HI)**

Richard F. Arakaki, MD\*  
Renee W. Latimer, BSN, MPH\*\*  
Narleen K. Baker-Ladao, BS  
Ralph Beddow, MD  
Lorna Dias, AA  
Jillian Inouye, RN, PhD  
Marjorie K. Mau, MD  
Kathy Mikami, BS, RD  
Pharis Mohideen, MD  
Sharon K. Odom, RD, MPH  
Raynette U. Perry, AA

**Southwest American Indian Centers (Phoenix, AZ; Shiprock, NM; Zuni, NM)**

William C. Knowler, MD, DrPH\*+  
Norman Coeeyate\*\*  
Mary A. Hoskin, RD, MS\*\*  
Carol A. Percy, RN, MS\*\*  
Kelly J. Acton, MD, MPH  
Vickie L. Andre, RN, FNP  
Rosalyn Barber  
Shandiin Begay, MPH

## SUPPLEMENTARY DATA

Peter H. Bennett, MB, FRCP  
Mary Beth Benson, RN, BSN  
Evelyn C. Bird, RD, MPH  
Brenda A. Broussard, RD, MPH, MBA, CDE  
Marcella Chavez, RN, AS  
Tara Dacawyma  
Matthew S. Doughty, MD  
Roberta Duncan, RD  
Cyndy Edgerton, RD  
Jacqueline M. Ghahate  
Justin Glass, MD  
Martia Glass, MD  
Dorothy Gohdes, MD  
Wendy Grant, MD  
Robert L. Hanson, MD, MPH  
Ellie Horse  
Louise E. Ingraham, MS, RD, LN  
Merry Jackson  
Priscilla Jay  
Roylen S. Kaskalla  
David Kessler, MD  
Kathleen M. Kobus, RNC-ANP  
Jonathan Krakoff, MD  
Catherine Manus, LPN  
Sara Michaels, MD  
Tina Morgan  
Yolanda Nashboo (deceased)  
Julie A. Nelson, RD  
Steven Poirier, MD  
Evette Polczynski, MD  
Mike Reidy, MD  
Jeanine Roumain, MD, MPH  
Debra Rowse, MD  
Sandra Sangster  
Janet Sewenemewa  
Darryl Tonemah, PhD  
Charlton Wilson, MD  
Michelle Yazzie

**George Washington University Biostatistics Center (DPP Coordinating Center  
Rockville, MD)**

Raymond Bain, PhD\*  
Sarah Fowler, PhD\*  
Tina Brenneman\*\*  
Solome Abebe  
Julie Bamdad, MS  
Jackie Callaghan  
Sharon L. Edelstein, ScM  
Yuping Gao  
Kristina L. Grimes  
Nisha Grover  
Lori Haffner, MS  
Steve Jones  
Tara L. Jones  
Richard Katz, MD



SUPPLEMENTARY DATA

John M. Lachin, ScD

Pamela Mucik

Robert Orlosky

James Rochon, PhD

Alla Sapozhnikova

Hanna Sherif, MS

Charlotte Stimpson

Marinella Temprosa, MS

Fredricka Walker-Murray

**Central Biochemistry Laboratory (Seattle, WA)**

Santica Marcovina, PhD, ScD\*

Greg Strylewicz, PhD\*\*

F. Alan Aldrich

**Carotid Ultrasound**

Dan O'Leary, MD\*

**CT Scan Reading Center**

Elizabeth Stamm, MD\*

**Epidemiological Cardiology Research Center- Epicare (Winston-Salem, NC)**

Pentti Rautaharju, MD, PhD\*

Ronald J. Prineas, MD, PhD\*/\*

Teresa Alexander

Charles Campbell, MS

Sharon Hall

Yabing Li, MD

Margaret Mills

Nancy Pemberton, MS

Farida Rautaharju, PhD

Zhuming Zhang, MD

**Nutrition Coding Center (Columbia, SC)**

Elizabeth Mayer-Davis, PhD\*

Robert R. Moran, PhD\*\*

**Quality of Well-Being Center (La Jolla, CA)**

Ted Ganiats, MD\*

Kristin David, MHP\*

Andrew J. Sarkin, PhD\*

Erik Groessl, PhD

**NIH/NIDDK (Bethesda, MD)**

R. Eastman, MD

Judith Fradkin, MD

Sanford Garfield, PhD

**Centers for Disease Control & Prevention (Atlanta, GA)**

Edward Gregg, PhD

Ping Zhang, PhD

**University of Michigan (Ann Arbor, MI)**

William H. Herman, MD, MPH

**+Genetics Working Group**

Jose C. Florez, MD, PhD<sup>1,2</sup>

David Altshuler, MD, PhD<sup>1,2</sup>

Liana K. Billings, MD<sup>1</sup>

Ling Chen, MS<sup>1</sup>

Maegan Harden, BS<sup>2</sup>

Robert L. Hanson, MD, MPH<sup>3</sup>

William C. Knowler, MD, DrPH<sup>3</sup>

Toni I. Pollin, PhD<sup>4</sup>

## SUPPLEMENTARY DATA

Alan R. Shuldiner, MD<sup>4</sup>  
Kathleen Jablonski, PhD<sup>5</sup>  
Paul W. Franks, PhD, MPhil, MS<sup>6, 7, 8</sup>  
Marie-France Hivert, MD<sup>9</sup>

1=Massachusetts General Hospital

2=Broad Institute

3=NIDDK

4=University of Maryland

5=Coordinating Center

6=Lund University, Sweden

7=Umeå University, Sweden

8=Harvard School of Public Health

9=Université de Sherbrooke
